# Supplementary material for: Molecular Evolution of Chloroplast Genomes of Orchid Species: Insights into Phylogenetic Relationship and Adaptive Evolution
Source: PubMed Central journal article supplement (PMC5877577; doi:10.3390/ijms19030716), 2018-03-02
Supplement: ijms-19-00716-s001.pdf [file ijms-19-00716-s001.pdf]

**Table S1.** List of taxa sampled in this study and species accessions numbers (GenBank).

| Subfamily                          | Species                                        | Accession number              |
|------------------------------------|------------------------------------------------|-------------------------------|
| Orchidaceae subfam. Epidendroideae | <i>Cymbidium aloifolium</i>                    | KC876122                      |
|                                    | <i>Cymbidium ensifolium</i>                    | KU179434                      |
|                                    | <i>Cymbidium faberi</i>                        | KR919606                      |
|                                    | <i>Cymbidium goeringii</i>                     | KT722982                      |
|                                    | <i>Cymbidium kanran</i>                        | KU179435                      |
|                                    | <i>Cymbidium lancifolium</i>                   | KU179436                      |
|                                    | <i>Cymbidium macrorhizon</i>                   | KU179437                      |
|                                    | <i>Cymbidium mannii</i>                        | KC876126                      |
|                                    | <i>Cymbidium sinense</i>                       | KC876123                      |
|                                    | <i>Cymbidium tortisepalum</i>                  | KC876124                      |
|                                    | <i>Cymbidium tracyanum</i>                     | KC876127                      |
|                                    | <i>Dendrobium huoshanense</i>                  | KT630834                      |
|                                    | <i>Dendrobium nobile</i>                       | KX377961                      |
|                                    | <i>Dendrobium officinale</i>                   | KC771275                      |
|                                    | <i>Dendrobium pendulum</i>                     | KT695604                      |
|                                    | <i>Dendrobium strongylanthum</i>               | KR673323                      |
|                                    | <i>Bletilla ochracea</i>                       | KT695602                      |
|                                    | <i>Bletilla striata</i>                        | KT588924                      |
|                                    | <i>Cattleya crispata</i>                       | KP168671                      |
|                                    | <i>Cattleya liliputana</i>                     | NC_032083                     |
|                                    | <i>Masdevallia coccinea</i>                    | KP205432                      |
|                                    | <i>Masdevallia picturata</i>                   | NC_026777                     |
|                                    | <i>Erycina pusilla</i>                         | JF746994                      |
|                                    | <i>Oncidium Gower Ramsey</i>                   | GQ324949                      |
|                                    | <i>Phalaenopsis aphrodite subsp. Formosana</i> | AY916449                      |
|                                    | <i>Phalaenopsis equestris</i>                  | JF719062                      |
|                                    | <i>Calanthe triplicata</i>                     | KF753635                      |
|                                    | <i>Calanthe davidii</i>                        | MG925365                      |
|                                    | <i>Cremastra appendiculata</i>                 | MG925366                      |
|                                    | <i>Sobralia callosa</i>                        | KM032623                      |
|                                    | <i>Elleanthus sodiroi</i>                      | KR260986                      |
|                                    | <i>Corallorhiza striata var. vreelandii</i>    | JX087681                      |
|                                    | Orchidaceae subfam. Orchidoideae               | <i>Habenaria pantlingiana</i> |
| <i>Goodyera fumata</i>             |                                                | KJ501999                      |
| <i>Goodyera procera</i>            |                                                | KT886429                      |
| <i>Goodyera schlechtendaliana</i>  |                                                | KT886431                      |

|                                    |                                  |           |
|------------------------------------|----------------------------------|-----------|
|                                    | <i>Goodyera velutina</i>         | KT886432  |
|                                    | <i>Epipactis mairei</i>          | MG925367  |
|                                    | <i>Epipactis veratrifolia</i>    | KU551267  |
|                                    | <i>Anoectochilus emeiensis</i>   | LC057212  |
|                                    | <i>Cephalanthera longifolia</i>  | KU551263  |
|                                    | <i>Ludisia discolor</i>          | KU578274  |
|                                    | <i>Listera fugongensis</i>       | KU551270  |
|                                    | <i>Platanthera japonica</i>      | MG926368  |
| Orchidaceae subfam. Vanilloideae   | <i>Vanilla planifolia</i>        | KJ566306  |
| Orchidaceae subfam. Cyripedioideae | <i>Paphiopedilum armeniacum</i>  | KJ566307  |
|                                    | <i>Paphiopedilum niveum</i>      | KJ524105  |
|                                    | <i>Phragmipedium longifolium</i> | KM032625  |
| Orchidaceae subfam. Apostasioideae | <i>Apostasia odorata</i>         | KM244734  |
|                                    | <i>Neuwiedia singaporeana</i>    | KM244735  |
| Outgroup                           | <i>Artemisia argyi</i>           | KM386991  |
|                                    | <i>Megadenia pygmaea</i>         | NC_034357 |

---

Table S2. The repeats distribution in the chloroplast genomes of four Orchidaceae species.

Table S2a. The repeats distribution in *Cremastra appendiculata* chloroplast genome.

|                   | Length of the<br>1st repeat | Starting position of<br>the 1st repeat | Direction | Length of the 2nd<br>repeat | Starting position of<br>the 2nd repeat | Distance between<br>the repeats | Evalue    | RegionA                    | RegionB                    |
|-------------------|-----------------------------|----------------------------------------|-----------|-----------------------------|----------------------------------------|---------------------------------|-----------|----------------------------|----------------------------|
| Dispersed repeats | 203                         | 30108                                  | F         | 203                         | 30311                                  | 0                               | 4.11E-113 | LSC;IGS(petN-psbM)         | LSC;IGS(petN-psbM)         |
|                   | 150                         | 50518                                  | F         | 150                         | 50670                                  | 0                               | 3.33E-81  | LSC;IGS(trnF-GAA-ndhJ)     | LSC;IGS(trnF-GAA-ndhJ)     |
|                   | 148                         | 29384                                  | F         | 148                         | 29530                                  | 0                               | 5.33E-80  | LSC;IGS(trnC-GCA-petN)     | LSC;IGS(trnC-GCA-petN)     |
|                   | 141                         | 89163                                  | F         | 141                         | 89541                                  | 0                               | 8.73E-76  | IRB;IGS(rpl23-rpl2)        | IRB;CDS(rpl23)             |
|                   | 141                         | 152736                                 | F         | 141                         | 153114                                 | 0                               | 8.73E-76  | IRA;CDS(rpl23)             | IRA;IGS(rpl23-rpl2)        |
|                   | 128                         | 48078                                  | F         | 128                         | 48205                                  | 0                               | 5.86E-68  | LSC;IGS(trnT-UGU-trnL-UAA) | LSC;IGS(trnT-UGU-trnL-UAA) |
|                   | 123                         | 89066                                  | F         | 123                         | 89419                                  | -2                              | 4.05E-60  | IRB;IGS(rpl2)              | IRB;IGS(rpl2-rpl23)        |
|                   | 123                         | 152876                                 | F         | 123                         | 153229                                 | -2                              | 4.05E-60  | IRA;IGS(rpl23-rpl2)        | IRA;IGS(rpl2)              |
|                   | 113                         | 125502                                 | F         | 113                         | 125614                                 | 0                               | 6.29E-59  | SSC;IGS(rps15-ycf1)        | SSC;CDS(ycf1)              |
|                   | 109                         | 7837                                   | F         | 109                         | 7944                                   | 0                               | 1.61E-56  | LSC;IGS(trnQ-UUG-psbK)     | LSC;IGS(trnQ-UUG-psbK)     |
|                   | 102                         | 122548                                 | F         | 102                         | 122647                                 | 0                               | 2.64E-52  | SSC;IGS(ndhH-rps15)        | SSC;IGS(ndhH-rps15)        |
|                   | 100                         | 64572                                  | F         | 100                         | 64681                                  | 0                               | 4.22E-51  | LSC;IGS(petA-psbJ)         | LSC;IGS(petA-psbJ)         |
|                   | 99                          | 103492                                 | F         | 99                          | 103590                                 | 0                               | 1.69E-50  | IRB;IGS(rps12-trnV-GAC)    | IRB;IGS(rps12-trnV-GAC)    |
|                   | 99                          | 138729                                 | F         | 99                          | 138827                                 | 0                               | 1.69E-50  | IRA;IGS(trnV-GAC-rps12)    | IRA;IGS(trnV-GAC-rps12)    |
|                   | 98                          | 44683                                  | F         | 98                          | 44780                                  | 0                               | 6.76E-50  | LSC;CDS(ycf3 intron)       | LSC;CDS(ycf3 intron)       |
|                   | 96                          | 67043                                  | F         | 96                          | 67142                                  | 0                               | 1.08E-48  | LSC;IGS(psbE-petL)         | LSC;IGS(psbE-petL)         |
|                   | 86                          | 50244                                  | F         | 86                          | 50344                                  | 0                               | 1.13E-42  | LSC;IGS(trnF-GAA-ndhJ)     | LSC;IGS(trnF-GAA-ndhJ)     |
|                   | 86                          | 124268                                 | F         | 86                          | 124366                                 | 0                               | 1.13E-42  | LSC;IGS(rps15-ycf1)        | LSC;IGS(rps15-ycf1)        |
|                   | 84                          | 3824                                   | F         | 84                          | 3914                                   | 0                               | 1.81E-41  | LSC;tRNA(trnK-UUU intron)  | LSC;tRNA(trnK-UUU intron)  |
|                   | 94                          | 0                                      | F         | 94                          | 155226                                 | -3                              | 6.26E-41  | LSC;IGS(rps19-psbA)        | IRA;CDS(rps19)             |
|                   | 85                          | 115744                                 | F         | 85                          | 115837                                 | -1                              | 1.16E-39  | SSC;IGS(rpl32-trnL-UAG)    | SSC;IGS(rpl32-trnL-UAG)    |
|                   | 81                          | 37465                                  | F         | 81                          | 37560                                  | 0                               | 1.16E-39  | LSC;IGS(lhbA-trnG-GCC)     | LSC;IGS(lhbA-trnG-GCC)     |
|                   | 73                          | 71222                                  | F         | 73                          | 71307                                  | 0                               | 7.61E-35  | LSC;IGS(rpl20-clpP)        | LSC;IGS(rpl20-clpP)        |
|                   | 59                          | 46732                                  | F         | 59                          | 46801                                  | 0                               | 2.04E-26  | LSC;IGS(trnS-GGA-rps4)     | LSC;IGS(trnS-GGA-rps4)     |
|                   | 55                          | 120276                                 | F         | 55                          | 120344                                 | -3                              | 1.05E-25  | SSC;IGS(ndhE-ndhG)         | SSC;IGS(ndhE-ndhG)         |
|                   | 56                          | 34099                                  | F         | 56                          | 34177                                  | 0                               | 1.31E-24  | LSC;IGS(trnT-GGU-psbD)     | LSC;IGS(trnT-GGU-psbD)     |
|                   | 54                          | 33434                                  | F         | 54                          | 33504                                  | 0                               | 2.09E-23  | LSC;IGS(trnT-GGU-psbD)     | LSC;IGS(trnT-GGU-psbD)     |
|                   | 50                          | 44                                     | F         | 50                          | 155270                                 | 0                               | 5.35E-21  | LSC;IGS(rps19-psbA)        | LSC;IGS(rps19-psbA)        |
|                   | 47                          | 8941                                   | F         | 47                          | 9008                                   | 0                               | 3.43E-19  | LSC;IGS(psbI-trnS-GCU)     | LSC;IGS(psbI-trnS-GCU)     |

|                     |     |        |   |     |        |    |          |                             |                             |
|---------------------|-----|--------|---|-----|--------|----|----------|-----------------------------|-----------------------------|
|                     | 43  | 70788  | F | 43  | 70842  | 0  | 8.77E-17 | LSC;IGS(rpl20-clpP)         | LSC;IGS(rpl20-clpP)         |
|                     | 45  | 37851  | F | 45  | 37913  | -1 | 7.40E-16 | LSC;IGS(trnG-GCC-trnfM-CAU) | LSC;IGS(trnG-GCC-trnfM-CAU) |
|                     | 41  | 23674  | F | 41  | 23728  | 0  | 1.40E-15 | LSC;CDS(rpoC1 intron)       | LSC;CDS(rpoC1 intron)       |
|                     | 37  | 8623   | F | 37  | 8676   | 0  | 3.59E-13 | LSC;IGS(psbK-psbI)          | LSC;IGS(psbK-psbI)          |
|                     | 34  | 89331  | F | 34  | 89656  | 0  | 2.30E-11 | IRB;IGS(rpl2-rpl23)         | IRB;CDS(rpl23)              |
|                     | 34  | 123340 | F | 34  | 123398 | 0  | 2.30E-11 | SSC;IGS(rps15-ycf1)         | SSC;IGS(rps15-ycf1)         |
|                     | 34  | 152728 | F | 34  | 153053 | 0  | 2.30E-11 | IRA;CDS(rpl23)              | IRA;IGS(rpl23-rpl2)         |
|                     | 43  | 55451  | F | 43  | 55505  | -3 | 2.92E-11 | LSC;IGS(atpB-rbcL)          | LSC;IGS(atpB-rbcL)          |
|                     | 32  | 6160   | F | 32  | 6221   | 0  | 3.68E-10 | LSC;IGS(rps16-trnQ-UUG)     | LSC;IGS(rps16-trnQ-UUG)     |
|                     | 30  | 116262 | F | 30  | 116327 | 0  | 5.89E-09 | SSC;IGS(rpl32-trnL-UAG)     | SSC;IGS(rpl32-trnL-UAG)     |
|                     | 35  | 9850   | F | 35  | 9893   | -3 | 1.02E-06 | LSC;IGS(trnS-GCU-trnG-UCC)  | LSC;IGS(trnS-GCU-trnG-UCC)  |
|                     | 30  | 40072  | F | 30  | 42296  | -2 | 2.30E-05 | LSC;CDS(psaB)               | LSC;IGS(psaA)               |
|                     | 30  | 89305  | F | 30  | 89327  | -2 | 2.30E-05 | IRB;IGS(rpl2-rpl23)         | IRB;IGS(rpl2-rpl23)         |
|                     | 30  | 153061 | F | 30  | 153083 | -2 | 2.30E-05 | IRA;IGS(rpl23-rpl2)         | IRA;IGS(rpl23-rpl2)         |
|                     | 39  | 4233   | R | 39  | 4233   | 0  | 2.24E-14 | LSC;tRNA(trnK-UUU intron)   | LSC;tRNA(trnK-UUU intron)   |
|                     | 30  | 123176 | R | 30  | 123176 | -2 | 2.30E-05 | SSC;IGS(RPS15-ycf1)         | SSC;IGS(RPS15-ycf1)         |
| Palindromic repeats | 141 | 89163  | P | 141 | 152736 | 0  | 8.73E-76 | IRB;IGS(rpl23-rpl2)         | IRA;CDS(rpl23)              |
|                     | 141 | 89541  | P | 141 | 153114 | 0  | 8.73E-76 | IRB;CDS(rpl23)              | IRA;IGS(rpl23-rpl2)         |
|                     | 139 | 251    | P | 139 | 86767  | 0  | 1.40E-74 | LSC;IGS(rps19-psbA)         | LSC;CDS(rpl22)              |
|                     | 123 | 89066  | P | 123 | 152876 | -2 | 4.05E-60 | IRB;IGS(rpl2)               | IRA;IGS(rpl23-rpl2)         |
|                     | 123 | 89419  | P | 123 | 153229 | -2 | 4.05E-60 | IRB;IGS(rpl2-rpl23)         | IRA;IGS(rpl2)               |
|                     | 99  | 103492 | P | 99  | 138729 | 0  | 1.69E-50 | IRB;IGS(rps12-trnV-GAC)     | IRA;IGS(trnV-GAC-rps12)     |
|                     | 99  | 103590 | P | 99  | 138827 | 0  | 1.69E-50 | IRB;IGS(rps12-trnV-GAC)     | IRA;IGS(trnV-GAC-rps12)     |
|                     | 31  | 0      | P | 31  | 87162  | -3 | 4.17E-42 | LSC;IGS(rps19-psbA)         | IRB;CDS(rps19)              |
|                     | 50  | 44     | P | 50  | 87098  | -3 | 3.35E-22 | LSC;IGS(rps19-psbA)         | IRB;CDS(rps19)              |
|                     | 30  | 439    | P | 30  | 470    | -1 | 2.34E-25 | LSC;IGS(rps19-psbA)         | LSC;IGS(rps19-psbA)         |
|                     | 48  | 5693   | P | 48  | 5693   | 0  | 8.56E-20 | LSC;IGS(rps16-trnQ-UUG)     | LSC;IGS(rps16-trnQ-UUG)     |
|                     | 46  | 30707  | P | 46  | 30707  | 0  | 1.37E-18 | LSC;IGS(petN-psbM)          | LSC;IGS(petN-psbM)          |
|                     | 45  | 64610  | P | 45  | 64719  | -1 | 7.40E-16 | LSC;IGS(petA-psbJ)          | LSC;IGS(petA-psbJ)          |
|                     | 31  | 113    | P | 31  | 87040  | -2 | 8.69E-16 | LSC;IGS(rps19-psbA)         | LSC;IGS(rpl22-rps19)        |
|                     | 47  | 65361  | P | 47  | 65361  | -3 | 1.50E-13 | LSC;IGS(petA-psbJ)          | LSC;IGS(petA-psbJ)          |
|                     | 36  | 37918  | P | 36  | 37918  | 0  | 1.44E-12 | LSC;IGS(trnG-GCC-trnfM-CAU) | LSC;IGS(trnG-GCC-trnfM-CAU) |
|                     | 36  | 83453  | P | 36  | 83453  | 0  | 1.44E-12 | LSC;CDS(rpl14)              | LSC;CDS(rpl14)              |

|    |        |   |    |        |    |          |                             |                             |
|----|--------|---|----|--------|----|----------|-----------------------------|-----------------------------|
| 35 | 37856  | P | 35 | 37919  | 0  | 5.75E-12 | LSC;IGS(trnG-GCC-trnFM-CAU) | LSC;IGS(trnG-GCC-trnFM-CAU) |
| 34 | 37857  | P | 34 | 37857  | 0  | 2.30E-11 | LSC;IGS(trnG-GCC-trnFM-CAU) | LSC;IGS(trnG-GCC-trnFM-CAU) |
| 34 | 89331  | P | 34 | 152728 | 0  | 2.30E-11 | IRB;IGS(rpl2-rpl23)         | IRA;CDS(rpl23)              |
| 34 | 89656  | P | 34 | 153053 | 0  | 2.30E-11 | IRB;CDS(rpl23)              | IRA;IGS(rpl23-rpl2)         |
| 39 | 45133  | P | 39 | 139830 | -3 | 5.54E-09 | LSC;CDS(ycf3 intron)        | IRA;IGS(trnV-GAC-rps12)     |
| 39 | 123152 | P | 39 | 123152 | -3 | 5.54E-09 | SSC;IGS(rps15-ycf1)         | SSC;IGS(rps15-ycf1)         |
| 30 | 48110  | P | 30 | 48237  | 0  | 5.89E-09 | LSC;IGS(trnT-UGU-trnL-UAA)  | LSC;IGS(trnT-UGU-trnL-UAA)  |
| 30 | 117117 | P | 30 | 117117 | 0  | 5.89E-09 | SSC;CDS(ccsA)               | SSC;CDS(ccsA)               |
| 32 | 200    | P | 32 | 86943  | -1 | 3.53E-08 | LSC;IGS(rps19-psbA)         | LSC;IGS(rpl22-rps19)        |
| 37 | 124623 | P | 37 | 124623 | -3 | 7.54E-08 | SSC;IGS(rps15-ycf1)         | SSC;IGS(rps15-ycf1)         |
| 31 | 9107   | P | 31 | 46566  | -1 | 1.37E-07 | LSC;tRNA(trnS-GCU)          | LSC;tRNA(trnS-GGA)          |
| 35 | 85725  | P | 35 | 85725  | -3 | 1.02E-06 | LSC;IGS(rpl16-rps3)         | LSC;IGS(rpl16-rps3)         |
| 35 | 116546 | P | 35 | 116546 | -3 | 1.02E-06 | SSC;IGS(trnL-UAG-ccsA)      | SSC;IGS(trnL-UAG-ccsA)      |
| 30 | 120730 | P | 30 | 120730 | -2 | 1.64E-06 | SSC;IGS(ndhG-ndhA)          | SSC;IGS(ndhG-ndhA)          |
| 30 | 89305  | P | 30 | 153061 | -2 | 2.30E-05 | IRB;IGS(rpl2-rpl23)         | IRA;IGS(rpl23-rpl2)         |
| 30 | 89327  | P | 30 | 153083 | -2 | 2.30E-05 | IRB;IGS(rpl2-rpl23)         | IRA;IGS(rpl23-rpl2)         |

Table S2b The repeats distribution in *Calanthe davidii* chloroplast genome.

|                   | Length of the 1st repeat | Starting position of the 1st repeat | Direction | Length of the 2nd repeat | Starting position of the 2nd repeat | Distance between the repeats | Evalue   | RegionA                                        | RegionB                                    |
|-------------------|--------------------------|-------------------------------------|-----------|--------------------------|-------------------------------------|------------------------------|----------|------------------------------------------------|--------------------------------------------|
| Dispersed repeats | 150                      | 49319                               | F         | 150                      | 49575                               | 0                            | 3.26E-81 | LSC; IGS, tRNA ( trnL-UAA-trnF-GAA, trnF-GAA ) | LSC; tRNA, IGS ( trnF-GAA, trnF-GAA-ndhJ ) |
|                   | 137                      | 84404                               | F         | 137                      | 101709                              | 0                            | 2.19E-73 | LSC; CDS ( rpl16 intron )                      | IRb; IGS ( rps12-trnV-GAC )                |
|                   | 117                      | 54835                               | F         | 117                      | 54951                               | 0                            | 2.40E-61 | LSC; IGS ( atpB-rbcL )                         | LSC; IGS ( atpB-rbcL )                     |
|                   | 100                      | 45482                               | F         | 100                      | 45593                               | 0                            | 4.13E-51 | LSC; IGS ( ycf3-trnS-GGA )                     | LSC; IGS ( ycf3-trnS-GGA )                 |
|                   | 97                       | 114518                              | F         | 97                       | 114611                              | 0                            | 2.64E-49 | SSC; IGS ( rpl32-trnL-UAG )                    | SSC; IGS ( rpl32-trnL-UAG )                |
|                   | 83                       | 42717                               | F         | 83                       | 42813                               | 0                            | 7.10E-41 | LSC; IGS ( psaA-ycf3 )                         | LSC; IGS ( psaA-ycf3 )                     |
|                   | 82                       | 50950                               | F         | 82                       | 51044                               | 0                            | 2.84E-40 | LSC; CDS ( ndhK )                              | LSC; CDS, CDS ( ndhK, ndhC )               |
|                   | 79                       | 62496                               | F         | 79                       | 62591                               | 0                            | 1.82E-38 | LSC; CDS, IGS ( cemA, cemA-petA )              | LSC; IGS ( cemA-petA )                     |
|                   | 74                       | 111166                              | F         | 74                       | 111238                              | 0                            | 1.86E-35 | IRb; IGS ( trnR-ACG-trnN-GUU )                 | IRb; IGS ( trnR-ACG-trnN-GUU )             |
|                   | 74                       | 128362                              | F         | 74                       | 128434                              | 0                            | 1.86E-35 | IRa; IGS ( trnN-GUU-trnR-ACG )                 | IRa; IGS ( trnN-GUU-trnR-ACG )             |
|                   | 69                       | 83770                               | F         | 69                       | 83845                               | -1                           | 3.94E-30 | LSC; CDS ( rpl16 intron )                      | LSC; CDS ( rpl16 intron )                  |

|                     |    |        |   |    |        |    |          |                                          |                                           |
|---------------------|----|--------|---|----|--------|----|----------|------------------------------------------|-------------------------------------------|
|                     | 63 | 84     | F | 63 | 153566 | 0  | 7.80E-29 | LSC; IGS ( rps19-psbA )                  | IRa; IGS ( rps19-psbA )                   |
|                     | 65 | 47574  | F | 65 | 47653  | -1 | 9.51E-28 | LSC; IGS ( trnT-UGU-trnL-UAA )           | LSC; IGS ( trnT-UGU-trnL-UAA )            |
|                     | 58 | 14051  | F | 58 | 14110  | 0  | 7.99E-26 | LSC;IGS ( atpF-atpH )                    | LSC;IGS, CDS ( atpF-atpH, atpH )          |
|                     | 56 | 114959 | F | 56 | 115017 | 0  | 1.28E-24 | SSC; IGS ( rpl32-trnL-UAG )              | SSC; IGS ( rpl32-trnL-UAG )               |
|                     | 56 | 123664 | F | 56 | 123727 | 0  | 1.28E-24 | SSC; CDS ( ycf1 )                        | SSC; CDS ( ycf1 )                         |
|                     | 56 | 33658  | F | 56 | 33736  | -1 | 2.15E-22 | LSC; IGS ( trnT-GGU-psbD )               | LSC; IGS ( trnT-GGU-psbD )                |
|                     | 52 | 91115  | F | 52 | 91167  | 0  | 3.27E-22 | IRb; IGS, CDS ( trnI-CAU-ycf2,<br>ycf2 ) | IRb; CDS ( ycf2 )                         |
|                     | 52 | 148455 | F | 52 | 148507 | 0  | 3.27E-22 | IRa; CDS ( ycf2 )                        | IRa; CDS, IGS ( ycf2, trnI-CAU-<br>ycf2 ) |
|                     | 49 | 37028  | F | 49 | 37108  | 0  | 2.09E-20 | LSC; IGS ( psbZ-trnG-UCC )               | LSC; IGS ( psbZ-trnG-UCC )                |
|                     | 47 | 86180  | F | 47 | 86219  | -1 | 4.73E-17 | IRb; IGS ( rpl22-rps19 )                 | IRb; IGS ( rpl22-rps19 )                  |
|                     | 47 | 153408 | F | 47 | 153447 | -1 | 4.73E-17 | IRa; IGS ( rps19-rpl22 )                 | IRa; IGS ( rps19-rpl22 )                  |
|                     | 39 | 44585  | F | 39 | 101362 | -2 | 1.46E-10 | LSC; CDS ( ycf3 intron2 )                | IRb; IGS ( rps12-trnV-GAC )               |
|                     | 39 | 44585  | F | 39 | 101903 | -2 | 1.46E-10 | LSC; CDS ( ycf3 intron2 )                | IRb; IGS ( rps12-trnV-GAC )               |
|                     | 31 | 93957  | F | 31 | 93975  | 0  | 1.44E-09 | IRb; CDS ( ycf2 )                        | IRb; CDS ( ycf2 )                         |
|                     | 31 | 145668 | F | 31 | 145686 | 0  | 1.44E-09 | IRa; CDS ( ycf2 )                        | IRa; CDS ( ycf2 )                         |
|                     | 30 | 73689  | F | 30 | 73739  | -2 | 2.25E-05 | LSC; IGS ( clpP-psbB )                   | LSC; IGS ( clpP-psbB )                    |
|                     | 31 | 14986  | F | 31 | 15008  | -3 | 1.75E-04 | LSC; IGS ( atpH-atpI )                   | LSC; IGS ( atpH-atpI )                    |
|                     | 30 | 39587  | F | 30 | 41811  | -3 | 6.31E-04 | LSC; CDS ( psaB )                        | LSC; CDS ( psaA )                         |
|                     | 30 | 46282  | F | 30 | 46295  | -3 | 6.31E-04 | LSC; IGS ( trnS-GGA-rps4 )               | LSC; IGS ( trnS-GGA-rps4 )                |
| Palindromic repeats | 63 | 84     | P | 63 | 86045  | 0  | 7.80E-29 | LSC; IGS ( rps19-psbA )                  | IRb; CDS, IGS ( rpl22, rpl22-<br>rps19 )  |
|                     | 59 | 167    | P | 59 | 167    | -1 | 3.54E-24 | LSC; IGS ( rps19-psbA )                  | LSC; IGS ( rps19-psbA )                   |
|                     | 52 | 91115  | P | 52 | 148455 | 0  | 3.27E-22 | IRb; IGS, CDS ( trnI-CAU-ycf2,<br>ycf2 ) | IRa; CDS ( ycf2 )                         |
|                     | 52 | 91167  | P | 52 | 148507 | 0  | 3.27E-22 | IRb; CDS ( ycf2 )                        | IRa; CDS, IGS ( ycf2, trnI-CAU-<br>ycf2 ) |
|                     | 48 | 30228  | P | 48 | 30228  | 0  | 8.38E-20 | LSC; IGS ( petN-psbM )                   | LSC; IGS ( petN-psbM )                    |
|                     | 57 | 64013  | P | 57 | 64013  | -3 | 2.52E-19 | LSC; IGS ( petA-psbJ )                   | LSC; IGS ( petA-psbJ )                    |
|                     | 47 | 86180  | P | 47 | 153408 | -1 | 4.73E-17 | IRb; IGS ( rpl22-rps19 )                 | IRa; IGS ( rps19-rpl22 )                  |
|                     | 47 | 86219  | P | 47 | 153447 | -1 | 4.73E-17 | IRb; IGS ( rpl22-rps19 )                 | IRa; IGS ( rps19-rpl22 )                  |

|    |        |   |    |        |    |          |                                            |                                            |
|----|--------|---|----|--------|----|----------|--------------------------------------------|--------------------------------------------|
| 34 | 119435 | P | 34 | 119435 | 0  | 2.25E-11 | SSC; IGS ( ndhI-ndhA )                     | SSC; IGS ( ndhI-ndhA )                     |
| 39 | 44585  | P | 39 | 137732 | -2 | 1.46E-10 | LSC; CDS ( ycf3 intron2 )                  | IRa; IGS ( tmV-GAC-rps12 )                 |
| 39 | 44585  | P | 39 | 138273 | -2 | 1.46E-10 | LSC; CDS ( ycf3 intron2 )                  | IRa; IGS ( tmV-GAC-rps12 )                 |
| 32 | 28273  | P | 32 | 28273  | 0  | 3.60E-10 | LSC; IGS ( rpoB-trnC-GCA )                 | LSC; IGS ( rpoB-trnC-GCA )                 |
| 31 | 93957  | P | 31 | 145668 | 0  | 1.44E-09 | IRb; CDS ( ycf2 )                          | IRa; CDS ( ycf2 )                          |
| 31 | 93975  | P | 31 | 145686 | 0  | 1.44E-09 | IRb; CDS ( ycf2 )                          | IRa; CDS ( ycf2 )                          |
| 36 | 29295  | P | 36 | 29295  | -2 | 7.97E-09 | LSC; IGS ( tmC-GCA-petN )                  | LSC; IGS ( tmC-GCA-petN )                  |
| 33 | 29690  | P | 33 | 29690  | -1 | 8.91E-09 | LSC; IGS ( petN-psbM )                     | LSC; IGS ( petN-psbM )                     |
| 37 | 121800 | P | 37 | 121800 | -3 | 7.37E-08 | SSC; IGS ( rps15-ycf1 )                    | SSC; IGS ( rps15-ycf1 )                    |
| 37 | 123170 | P | 37 | 123170 | -3 | 7.37E-08 | SSC; CDS ( ycf1 )                          | SSC; CDS ( ycf1 )                          |
| 30 | 8619   | P | 30 | 46049  | -1 | 5.18E-07 | LSC; tRNA ( tmS-GCU )                      | LSC; tRNA ( tmS-GGA )                      |
| 31 | 54839  | P | 31 | 118271 | -2 | 6.02E-06 | LSC; IGS ( atpB-rbcL )                     | SSC; IGS ( psaC-ndhE )                     |
| 31 | 54955  | P | 31 | 118271 | -2 | 6.02E-06 | LSC; IGS ( atpB-rbcL )                     | SSC; IGS ( psaC-ndhE )                     |
| 30 | 37411  | P | 30 | 37411  | -2 | 2.25E-05 | LSC; IGS ( tmG-UCC-trnFM-CAU )             | LSC; IGS ( tmG-UCC-trnFM-CAU )             |
| 32 | 36496  | P | 32 | 46049  | -3 | 4.82E-05 | LSC; IGS, tRNA ( psbC-trnS-UGA, trnS-UGA ) | LSC; tRNA, CDS ( trnS-GGA, trnS-GGA-rps4 ) |
| 32 | 49993  | P | 32 | 50077  | -3 | 4.82E-05 | LSC; IGS ( tmF-GAA-ndhJ )                  | LSC; IGS, CDS ( tmF-GAA-ndhJ, ndhJ )       |
| 31 | 1793   | P | 31 | 1793   | -3 | 1.75E-04 | LSC, tRNA ( tmK-UUU intron )               | LSC, tRNA ( tmK-UUU intron )               |
| 30 | 44597  | P | 30 | 137729 | -3 | 6.31E-04 | LSC; CDS ( ycf3 intron2 )                  | IRa; IGS ( tmV-GAC-rps12 )                 |
| 30 | 44597  | P | 30 | 138270 | -3 | 6.31E-04 | LSC; CDS ( ycf3 intron2 )                  | IRa; IGS ( tmV-GAC-rps12 )                 |

Table S2c The repeats distribution in *Epipactis mairei* chloroplast genome.

|                   | Length of the 1st repeat | Starting position of the 1st repeat | Direction | Length of the 2nd repeat | Starting position of the 2nd repeat | Distance between the repeats | Evalue    | RegionA                       | RegionB                       |
|-------------------|--------------------------|-------------------------------------|-----------|--------------------------|-------------------------------------|------------------------------|-----------|-------------------------------|-------------------------------|
| Dispersed repeats | 309                      | 8951                                | F         | 309                      | 9258                                | 0                            | 6.11E-177 | LSC; IGS ( tmS-GCU-trnG-GCC ) | LSC; IGS ( tmS-GCU-trnG-GCC ) |
|                   | 192                      | 3430                                | F         | 192                      | 3620                                | 0                            | 1.69E-106 | LSC; tRNA ( tmK-UUU intron )  | LSC; tRNA ( tmK-UUU intron )  |
|                   | 179                      | 59080                               | F         | 179                      | 59261                               | 0                            | 1.13E-98  | LSC; IGS ( accD-psaI )        | LSC; IGS ( accD-psaI )        |
|                   | 166                      | 2                                   | F         | 166                      | 153523                              | 0                            | 7.59E-91  | LSC; IGS ( rpl22-psbA )       | IRa; IGS ( rps19-rpl22 )      |
|                   | 158                      | 48351                               | F         | 158                      | 48508                               | 0                            | 4.98E-86  | LSC; tRNA ( tmL-UAA intron )  | LSC; tRNA ( tmL-UAA intron )  |

|     |        |   |     |        |    |          |                               |                               |
|-----|--------|---|-----|--------|----|----------|-------------------------------|-------------------------------|
| 155 | 13139  | F | 155 | 13294  | 0  | 3.18E-84 | LSC; CDS ( atpF intron )      | LSC; CDS ( atpF intron )      |
| 149 | 28201  | F | 149 | 28352  | 0  | 1.30E-80 | LSC; IGS ( rpoB-trnC-GCA )    | LSC; IGS ( rpoB-trnC-GCA )    |
| 144 | 75474  | F | 144 | 75610  | 0  | 1.34E-77 | LSC; IGS ( psbB-psbT )        | LSC; IGS ( psbB-psbT )        |
| 130 | 32313  | F | 130 | 32441  | 0  | 3.59E-69 | LSC; IGS ( tmE-UUC-trnT-GGU ) | LSC; IGS ( tmE-UUC-trnT-GGU ) |
| 129 | 49460  | F | 129 | 49861  | 0  | 1.43E-68 | LSC; IGS ( tmF-GAA-ndhJ )     | LSC; IGS ( tmF-GAA-ndhJ )     |
| 110 | 122646 | F | 110 | 122768 | 0  | 3.94E-57 | SSC; CDS ( ycf1 )             | SSC; CDS ( ycf1 )             |
| 116 | 7909   | F | 116 | 8019   | -2 | 5.78E-56 | LSC; IGS ( psbK-psbI )        | LSC; IGS ( psbK-psbI )        |
| 118 | 68124  | F | 118 | 68228  | -3 | 4.34E-55 | LSC; IGS ( psbJ-rpl33 )       | LSC; IGS ( psbJ-rpl33 )       |
| 102 | 99897  | F | 102 | 99997  | 0  | 2.58E-52 | IRb; IGS ( ndhB-rps7 )        | IRb; IGS ( ndhB-rps7 )        |
| 102 | 139665 | F | 102 | 139765 | 0  | 2.58E-52 | IRa; IGS ( rps7-ndhB )        | IRa; IGS ( rps7-ndhB )        |
| 82  | 125536 | F | 82  | 125617 | -1 | 6.99E-38 | SSC; CDS ( ycf1 )             | SSC; CDS ( ycf1 )             |
| 75  | 49031  | F | 75  | 49171  | 0  | 4.65E-36 | LSC; IGS ( tmL-UAA-trnF-GAA ) | LSC; IGS ( tmL-UAA-trnF-GAA ) |
| 72  | 43564  | F | 72  | 43652  | 0  | 2.98E-34 | LSC; CDS ( ycf3 intron1 )     | LSC; CDS ( ycf3 intron1 )     |
| 70  | 48975  | F | 70  | 49104  | 0  | 4.77E-33 | LSC; IGS ( tmL-UAA-trnF-GAA ) | LSC; IGS ( tmL-UAA-trnF-GAA ) |
| 70  | 65774  | F | 70  | 65864  | 0  | 4.77E-33 | LSC; IGS ( psbE-petL )        | LSC; IGS ( psbE-petL )        |
| 71  | 6693   | F | 71  | 6764   | -1 | 2.54E-31 | LSC; IGS ( rps16-trnQ-UUG )   | LSC; IGS ( rps16-trnQ-UUG )   |
| 63  | 14359  | F | 63  | 14441  | 0  | 7.81E-29 | LSC; IGS ( atpH-atpI )        | LSC; IGS ( atpH-atpI )        |
| 66  | 16097  | F | 66  | 16177  | -1 | 2.42E-28 | LSC; IGS ( atpI-rps2 )        | LSC; IGS ( atpI-rps2 )        |
| 61  | 56825  | F | 61  | 56899  | 0  | 1.25E-27 | LSC; IGS ( rbcL-accD )        | LSC; IGS ( rbcL-accD )        |
| 62  | 102397 | F | 62  | 102451 | -1 | 5.81E-26 | IRb; IGS ( rps12-trnV-GAC )   | IRb; IGS ( rps12-trnV-GAC )   |
| 62  | 137251 | F | 62  | 137305 | -1 | 5.81E-26 | IRa; IGS ( tmV-GAC -rps12 )   | IRa; IGS ( tmV-GAC -rps12 )   |
| 54  | 64166  | F | 54  | 64243  | 0  | 2.05E-23 | LSC; IGS ( petA-psbJ )        | LSC; IGS ( petA-psbJ )        |
| 47  | 13992  | F | 47  | 14052  | 0  | 3.35E-19 | LSC; IGS ( atpF-atpH )        | LSC; IGS ( atpF-atpH )        |
| 47  | 95901  | F | 47  | 95948  | 0  | 3.35E-19 | IRb; IGS ( ycf2-trnL-CAA )    | IRb; IGS ( ycf2-trnL-CAA )    |
| 47  | 143769 | F | 47  | 143816 | 0  | 3.35E-19 | IRa; IGS ( tmL-CAA-ycf2 )     | IRa; IGS ( tmL-CAA-ycf2 )     |
| 46  | 29845  | F | 46  | 29908  | 0  | 1.34E-18 | LSC; IGS ( petN-psbM )        | LSC; IGS ( petN-psbM )        |
| 45  | 33559  | F | 45  | 33627  | 0  | 5.37E-18 | LSC; IGS ( tmT-GGU-psbG )     | LSC; IGS ( tmT-GGU-psbG )     |
| 49  | 91558  | F | 49  | 91579  | -2 | 2.22E-16 | IRb; CDS ( ycf2 )             | IRb; CDS ( ycf2 )             |
| 49  | 148136 | F | 49  | 148157 | -2 | 2.22E-16 | IRa; CDS ( ycf2 )             | IRa; CDS ( ycf2 )             |
| 42  | 54712  | F | 42  | 54779  | 0  | 3.43E-16 | LSC; IGS ( atpB-rbcL )        | LSC; IGS ( atpB-rbcL )        |
| 40  | 61528  | F | 40  | 61575  | -1 | 6.59E-13 | LSC; IGS ( ycf4-cemA )        | LSC; IGS ( ycf4-cemA )        |
| 36  | 78942  | F | 36  | 78991  | 0  | 1.41E-12 | LSC; CDS ( petD intron )      | LSC; CDS ( petD intron )      |



|                     |     |        |   |     |        |    |          |                               |                                      |
|---------------------|-----|--------|---|-----|--------|----|----------|-------------------------------|--------------------------------------|
|                     | 36  | 94001  | F | 36  | 94019  | 0  | 1.41E-12 | IRb; CDS ( ycf2 )             | IRb; CDS ( ycf2 )                    |
|                     | 36  | 145709 | F | 36  | 145727 | 0  | 1.41E-12 | IRa; CDS ( ycf2 )             | IRa; CDS ( ycf2 )                    |
|                     | 36  | 111333 | F | 36  | 111367 | 0  | 1.41E-12 | IRb; IGS ( tmR-ACG- tmN-GUU ) | IRb; IGS ( tmR-ACG- tmN-GUU )        |
|                     | 36  | 128361 | F | 36  | 128395 | 0  | 1.41E-12 | IRa; IGS ( tmN-GUU-trnR-ACG ) | IRa; IGS ( tmN-GUU-trnR-ACG )        |
|                     | 35  | 111649 | F | 35  | 111689 | 0  | 5.63E-12 | IRb; IGS ( tmR-ACG- tmN-GUU ) | IRb; IGS ( tmR-ACG- tmN-GUU )        |
|                     | 35  | 128040 | F | 35  | 128080 | 0  | 5.63E-12 | IRa; IGS ( tmN-GUU-trnR-ACG ) | IRa; IGS ( tmN-GUU-trnR-ACG )        |
|                     | 34  | 115158 | F | 34  | 115220 | 0  | 2.25E-11 | SSC; IGS ( tmL-UAG-ccsA )     | SSC; IGS ( tmL-UAG-ccsA )            |
|                     | 32  | 121183 | F | 32  | 121235 | 0  | 3.60E-10 | SSC; IGS ( ndhH-rps15 )       | SSC; IGS ( ndhH-rps15 )              |
|                     | 31  | 114547 | F | 31  | 114595 | 0  | 1.44E-09 | LSC; IGS ( rpl32-tmL-UAG )    | LSC; IGS ( rpl32-tmL-UAG )           |
|                     | 33  | 75450  | R | 33  | 75450  | 0  | 9.00E-11 | LSC; IGS ( psbB-psbT )        | LSC; IGS ( psbB-psbT )               |
|                     | 33  | 73331  | R | 33  | 73335  | -3 | 1.33E-05 | LSC; IGS ( clpP-psbB )        | LSC; IGS ( clpP-psbB )               |
|                     | 32  | 9018   | R | 32  | 9316   | -3 | 4.82E-05 | LSC; IGS ( tmS-GCU-trnG-GCC ) | LSC; IGS ( tmS-GCU-trnG-GCC )        |
|                     | 32  | 75450  | C | 32  | 75451  | 0  | 3.60E-10 | LSC; IGS ( psbB-psbT )        | LSC; IGS ( psbB-psbT )               |
| Palindromic repeats | 167 | 2      | P | 167 | 86074  | 0  | 1.90E-91 | LSC; IGS ( rpl22-psbA )       | IRb; CDS, IGS ( rpl22, rpl22-rps19 ) |
|                     | 102 | 99897  | P | 102 | 139665 | 0  | 2.58E-52 | IRb; IGS ( ndhB-rps7 )        | IRa; IGS ( rps7-ndhB )               |
|                     | 102 | 99997  | P | 102 | 139765 | 0  | 2.58E-52 | IRb; IGS ( ndhB-rps7 )        | IRa; IGS ( rps7-ndhB )               |
|                     | 62  | 102397 | P | 62  | 137251 | -1 | 5.81E-26 | IRb; IGS ( rps12-tmV-GAC )    | IRa; IGS ( tmV-GAC -rps12)           |
|                     | 62  | 102451 | P | 62  | 137305 | -1 | 5.81E-26 | IRb; IGS ( rps12-tmV-GAC )    | IRa; IGS ( tmV-GAC -rps12)           |
|                     | 47  | 95901  | P | 47  | 143769 | 0  | 3.35E-19 | IRb; IGS ( ycf2-tmL-CAA )     | IRa; IGS ( tmL-CAA-ycf2 )            |
|                     | 47  | 95948  | P | 47  | 143816 | 0  | 3.35E-19 | IRb; IGS ( ycf2-tmL-CAA )     | IRa; IGS ( tmL-CAA-ycf2 )            |
|                     | 46  | 30355  | P | 46  | 30355  | 0  | 1.34E-18 | LSC; IGS ( petN-psbM )        | LSC; IGS ( petN-psbM )               |
|                     | 52  | 170    | P | 52  | 170    | -2 | 3.91E-18 | LSC; IGS ( rpl22-psbA )       | LSC; IGS ( rpl22-psbA )              |
|                     | 44  | 1819   | P | 44  | 1819   | 0  | 2.15E-17 | LSC; tRNA ( tmK-UUU intron )  | LSC; tRNA ( tmK-UUU intron )         |
|                     | 53  | 63867  | P | 53  | 63867  | -3 | 5.18E-17 | LSC; IGS ( petA-psbJ )        | LSC; IGS ( petA-psbJ )               |
|                     | 49  | 91558  | P | 49  | 148136 | -2 | 2.22E-16 | IRb; CDS ( ycf2 )             | IRa; CDS ( ycf2 )                    |
|                     | 49  | 91579  | P | 49  | 148157 | -2 | 2.22E-16 | IRb; CDS ( ycf2 )             | IRa; CDS ( ycf2 )                    |
|                     | 42  | 37167  | P | 42  | 37167  | 0  | 3.43E-16 | LSC; IGS ( psbZ-trnG-UCC )    | LSC; IGS ( psbZ-trnG-UCC )           |
|                     | 36  | 94001  | P | 36  | 145709 | 0  | 1.41E-12 | IRb; CDS ( ycf2 )             | IRa; CDS ( ycf2 )                    |
|                     | 36  | 94019  | P | 36  | 145727 | 0  | 1.41E-12 | IRb; CDS ( ycf2 )             | IRa; CDS ( ycf2 )                    |
|                     | 36  | 111333 | P | 36  | 128361 | 0  | 1.41E-12 | IRb; IGS ( tmR-ACG- tmN-GUU ) | IRa; IGS ( tmN-GUU-trnR-ACG )        |
|                     | 36  | 111367 | P | 36  | 128395 | 0  | 1.41E-12 | IRb; IGS ( tmR-ACG- tmN-GUU ) | IRa; IGS ( tmN-GUU-trnR-ACG )        |

|    |        |   |    |        |    |          |                                             |                                             |
|----|--------|---|----|--------|----|----------|---------------------------------------------|---------------------------------------------|
| 42 | 121703 | P | 42 | 121703 | -2 | 2.66E-12 | SSC; IGS ( rps15-ycf1 )                     | SSC; IGS ( rps15-ycf1 )                     |
| 35 | 111649 | P | 35 | 128040 | 0  | 5.63E-12 | IRb; IGS ( tmR-ACG- tmN-GUU )               | IRa; IGS ( tmN-GUU-tmR-ACG )                |
| 35 | 111689 | P | 35 | 128080 | 0  | 5.63E-12 | IRb; IGS ( tmR-ACG- tmN-GUU )               | IRa; IGS ( tmN-GUU-tmR-ACG )                |
| 39 | 44546  | P | 39 | 138254 | -2 | 1.47E-10 | LSC; CDS ( ycf3 intron2 )                   | IRa; IGS ( tmV-GAC -rps12)                  |
| 32 | 75450  | P | 32 | 75450  | 0  | 3.60E-10 | LSC; IGS ( psbB-psbT )                      | LSC; IGS ( psbB-psbT )                      |
| 38 | 1529   | P | 38 | 1529   | -2 | 5.56E-10 | LSC; IGS ( psbA-tmK-UUU )                   | LSC; IGS ( psbA-tmK-UUU )                   |
| 37 | 123146 | P | 37 | 123146 | -3 | 7.38E-08 | SSC; CDS ( ycf1 )                           | SSC; CDS ( ycf1 )                           |
| 31 | 8640   | P | 31 | 46012  | -1 | 1.34E-07 | LSC; tRNA ( tmS-GCU )                       | LSC; tRNA ( tmS-GGA )                       |
| 32 | 36430  | P | 32 | 46014  | -3 | 4.82E-05 | LSC; IGS, tRNA ( psbC-tmS-UGA,<br>tmS-UGA ) | LSC; tRNA, IGS ( tmS-GGA,<br>tmS-GGA-rps4 ) |
| 30 | 86302  | P | 30 | 153432 | -3 | 6.32E-04 | IRb; IGS, CDS ( rpl22-rps19, rps19 )        | IRa; CDS, IGS ( rps19, rps19-<br>rpl22 )    |
| 30 | 86325  | P | 30 | 153409 | -3 | 6.32E-04 | IRb; CDS ( rps19 )                          | IRa; CDS ( rps19 )                          |
| 30 | 91580  | P | 30 | 148154 | -3 | 6.32E-04 | IRb; CDS ( ycf2 )                           | IRa; CDS ( ycf2 )                           |
| 30 | 91601  | P | 30 | 148133 | -3 | 6.32E-04 | IRb; CDS ( ycf2 )                           | IRa; CDS ( ycf2 )                           |

Table S2d The repeats distribution in *Platanthera japonica* chloroplast genome.

|                   | Length of the 1st repeat | Starting position of the 1st repeat | Direction | Length of the 2nd repeat | Starting position of the 2nd repeat | Distance between the repeats | Evalue    | Region A                     | Region B                        |
|-------------------|--------------------------|-------------------------------------|-----------|--------------------------|-------------------------------------|------------------------------|-----------|------------------------------|---------------------------------|
| Dispersed repeats | 230                      | 54479                               | F         | 230                      | 54724                               | -1                           | 1.57E-126 | LSC; IGS ( atpB-rncL )       | LSC; IGS ( atpB-rncL )          |
|                   | 190                      | 63586                               | F         | 190                      | 63780                               | -3                           | 8.34E-98  | LSC; IGS ( petA-psbJ )       | LSC; IGS ( petA-psbJ )          |
|                   | 174                      | 29918                               | F         | 174                      | 30092                               | 0                            | 1.18E-95  | LSC; IGS ( petN-psbM )       | LSC; IGS ( petN-psbM )          |
|                   | 160                      | 63616                               | F         | 160                      | 63810                               | 0                            | 3.16E-87  | LSC; IGS ( petA-psbJ )       | LSC; IGS ( petA-psbJ )          |
|                   | 170                      | 14366                               | F         | 170                      | 14543                               | -3                           | 6.55E-86  | LSC; IGS ( atpH-atpI )       | LSC; IGS ( atpH-atpI )          |
|                   | 168                      | 118767                              | F         | 168                      | 118995                              | -3                           | 1.01E-84  | SSC; IGS ( pasC-ndhE )       | SSC; IGS ( pasC-ndhE )          |
|                   | 149                      | 48298                               | F         | 149                      | 48450                               | 0                            | 1.33E-80  | LSC; IGS ( tmL UAA intron )  | LSC; IGS ( tmL UAA intron )     |
|                   | 149                      | 118786                              | F         | 149                      | 119014                              | 0                            | 1.33E-80  | SSC; IGS ( psaC-ndhE )       | SSC; IGS ( psaC-ndhE )          |
|                   | 145                      | 48916                               | F         | 145                      | 49059                               | 0                            | 3.40E-78  | LSC; IGS ( tmL UAA-tmF GAA ) | LSC; IGS ( tmL UAA-tmF<br>GAA ) |
|                   | 145                      | 60853                               | F         | 145                      | 60995                               | 0                            | 3.40E-78  | LSC; IGS ( ycf4-cemA )       | LSC; IGS ( ycf4-cemA )          |
|                   | 112                      | 115088                              | F         | 112                      | 115197                              | 0                            | 2.51E-58  | LSC; IGS ( ndhF-rpl32 )      | LSC; IGS ( ndhF-rpl32 )         |

|     |        |   |     |        |    |          |                                 |                                 |
|-----|--------|---|-----|--------|----|----------|---------------------------------|---------------------------------|
| 106 | 126122 | F | 106 | 126227 | 0  | 1.03E-54 | SSC; CDS ( ycf1 )               | SSC; CDS ( ycf1 )               |
| 98  | 4872   | F | 98  | 4966   | -1 | 1.98E-47 | LSC; IGS ( trnK UUU-rps16 )     | LSC; IGS ( trnK UUU-rps16 )     |
| 89  | 28441  | F | 89  | 28546  | 0  | 1.76E-44 | LSC; IGS ( rpoB-trnC GCA )      | LSC; IGS ( rpoB-trnC GCA )      |
| 87  | 47733  | F | 87  | 47823  | 0  | 2.82E-43 | LSC; IGS ( trnT UGU-trnL UAA )  | LSC; IGS ( trnT UGU-trnL UAA )  |
| 86  | 73540  | F | 86  | 73626  | 0  | 1.13E-42 | LSC; IGS ( clpP-psbB )          | LSC; IGS ( clpP-psbB )          |
| 77  | 0      | F | 77  | 154918 | 0  | 2.96E-37 | LSC; IGS ( rps19-psbA )         | IRa; IGS ( rps19-psbA )         |
| 77  | 102200 | F | 77  | 102276 | 0  | 2.96E-37 | IRb; IGS ( rps12-trnV GAC )     | IRb; IGS ( rps12-trnV GAC )     |
| 77  | 138621 | F | 77  | 138697 | 0  | 2.96E-37 | IRa; IGS ( tmV GAC-rps12 )      | IRa; IGS ( tmV GAC-rps12 )      |
| 75  | 105706 | F | 75  | 105777 | 0  | 4.73E-36 | IRb; tRNA ( trnI GAU intron )   | IRb; tRNA ( trnI GAU intron )   |
| 75  | 135122 | F | 75  | 135193 | 0  | 4.73E-36 | IRa; tRNA ( trnI GAU intron )   | IRa; tRNA ( trnI GAU intron )   |
| 73  | 28122  | F | 73  | 28205  | 0  | 7.57E-35 | LSC; IGS ( rpoB-trnC GCA )      | LSC; IGS ( rpoB-trnC GCA )      |
| 72  | 56781  | F | 72  | 56864  | 0  | 3.03E-34 | LSC; IGS ( rbcL-accD )          | LSC; IGS ( rbcL-accD )          |
| 69  | 59466  | F | 69  | 59555  | 0  | 1.94E-32 | LSC; IGS ( accD-psaI )          | LSC; IGS ( accD-psaI )          |
| 67  | 1686   | F | 67  | 1766   | 0  | 3.10E-31 | IRb; tRNA ( trnI GAU intron )   | IRb; tRNA ( trnI GAU intron )   |
| 64  | 57203  | F | 64  | 57279  | 0  | 1.99E-29 | LSC; IGS ( rbcL-accD )          | LSC; IGS ( rbcL-accD )          |
| 62  | 69784  | F | 62  | 69873  | 0  | 3.18E-28 | LSC; IGS ( rpl20-rps12 )        | LSC; IGS ( rpl20-rps12 )        |
| 62  | 86084  | F | 62  | 86144  | 0  | 3.18E-28 | IRb; IGS ( rpl22-rps19 )        | IRb; IGS ( rpl22-rps19 )        |
| 62  | 154768 | F | 62  | 154828 | 0  | 3.18E-28 | IRa; IGS ( rps19-psbA )         | IRa; IGS ( rps19-psbA )         |
| 58  | 49446  | F | 58  | 49520  | 0  | 8.13E-26 | LSC; IGS ( trnF GAA-ndhJ )      | LSC; IGS ( trnF GAA-ndhJ )      |
| 61  | 78907  | F | 61  | 78986  | -1 | 2.33E-25 | LSC; CDS ( petD )               | LSC; CDS ( petD )               |
| 44  | 14818  | F | 44  | 14862  | 0  | 2.18E-17 | LSC; IGS ( atpH-atpI )          | LSC; IGS ( atpH-atpI )          |
| 47  | 118924 | F | 47  | 119151 | -1 | 4.81E-17 | SSC; IGS ( psaC-ndhE )          | SSC; IGS ( psaC-ndhE )          |
| 38  | 123804 | F | 38  | 123852 | 0  | 8.94E-14 | SSC; CDS ( ycf1 )               | SSC; CDS ( ycf1 )               |
| 36  | 1347   | F | 36  | 1412   | 0  | 1.43E-12 | LSC; IGS ( psbA-trnK UUU )      | LSC; IGS ( psbA-trnK UUU )      |
| 36  | 37317  | F | 36  | 37386  | 0  | 1.43E-12 | LSC; IGS ( trnG UCC-trnfM CAU ) | LSC; IGS ( trnG UCC-trnfM CAU ) |
| 35  | 13974  | F | 35  | 14013  | 0  | 5.72E-12 | LSC; IGS ( atpF-atpH )          | LSC; IGS ( atpF-atpH )          |

|                     |    |        |   |    |        |    |          |                               |                               |
|---------------------|----|--------|---|----|--------|----|----------|-------------------------------|-------------------------------|
|                     | 34 | 102951 | F | 34 | 102987 | 0  | 2.29E-11 | IRb; IGS ( rps12-trnV GAC )   | IRb; IGS ( rps12-trnV GAC )   |
|                     | 34 | 137953 | F | 34 | 137989 | 0  | 2.29E-11 | IRa; IGS ( tmV GAC-rps12 )    | IRa; IGS ( tmV GAC-rps12 )    |
|                     | 33 | 33614  | F | 33 | 33659  | 0  | 9.16E-11 | LSC; IGS ( tmT GGU-psbC )     | LSC; IGS ( tmT GGU-psbC )     |
|                     | 33 | 112075 | F | 33 | 112108 | 0  | 9.16E-11 | IRb; IGS ( tmR ACG-trmN GUU ) | IRb; IGS ( tmR ACG-trmN GUU ) |
|                     | 33 | 128833 | F | 33 | 128866 | 0  | 9.16E-11 | IRa; IGS ( tmN GUU-trmR ACG ) | IRa; IGS ( tmN GUU-trmR ACG ) |
|                     | 31 | 125373 | R | 31 | 125373 | -2 | 6.13E-06 | SSC; CDS ( ycf1 )             | SSC; CDS ( ycf1 )             |
|                     | 30 | 42905  | C | 30 | 56710  | -3 | 6.42E-04 | LSC; IGS ( psaA-ycf3 )        | LSC; IGS ( psaA-ycf3 )        |
| Palindromic repeats | 75 | 105706 | P | 75 | 135122 | 0  | 4.73E-36 | IRb; tRNA ( trnI GAU intron ) | IRa; tRNA ( trnI GAU intron ) |
|                     | 75 | 105777 | P | 75 | 135193 | 0  | 4.73E-36 | IRb; tRNA ( trnI GAU intron ) | IRa; tRNA ( trnI GAU intron ) |
|                     | 62 | 86084  | P | 62 | 154768 | 0  | 3.18E-28 | IRb; IGS ( rpl22-rps19 )      | IRa; IGS ( rps19-psbA )       |
|                     | 62 | 86144  | P | 62 | 154828 | 0  | 3.18E-28 | IRb; IGS ( rpl22-rps19 )      | IRa; IGS ( rps19-psbA )       |
|                     | 50 | 30338  | P | 50 | 30338  | 0  | 5.33E-21 | LSC; IGS ( petN-psbM )        | LSC; IGS ( petN-psbM )        |
|                     | 47 | 82     | P | 47 | 82     | -1 | 4.81E-17 | LSC; IGS ( rps19-psbA )       | LSC; IGS ( rps19-psbA )       |
|                     | 34 | 59987  | P | 34 | 59987  | 0  | 2.29E-11 | LSC; IGS ( psaI-ycf4 )        | LSC; IGS ( psaI-ycf4 )        |
|                     | 34 | 102951 | P | 34 | 137953 | 0  | 2.29E-11 | IRb; IGS ( rps12-trnV GAC )   | IRa; IGS ( tmV GAC-rps12 )    |
|                     | 34 | 102987 | P | 34 | 137989 | 0  | 2.29E-11 | IRb; IGS ( rps12-trnV GAC )   | IRa; IGS ( tmV GAC-rps12 )    |
|                     | 34 | 120014 | P | 34 | 120014 | 0  | 2.29E-11 | SSC; CDS ( ndhA intron )      | SSC; CDS ( ndhA intron )      |
|                     | 33 | 112075 | P | 33 | 128833 | 0  | 9.16E-11 | IRb; IGS ( tmR ACG-trmN GUU ) | IRa; IGS ( tmN GUU-trmR ACG ) |
|                     | 33 | 112108 | P | 33 | 128866 | 0  | 9.16E-11 | IRb; IGS ( tmR ACG-trmN GUU ) | IRa; IGS ( tmN GUU-trmR ACG ) |
|                     | 39 | 122393 | P | 39 | 122393 | -3 | 5.52E-09 | SSC; IGS ( rps15-ycf1 )       | SSC; IGS ( rps15-ycf1 )       |
|                     | 33 | 8673   | P | 33 | 45965  | -1 | 9.07E-09 | LSC; tRNA ( tmS GCU )         | LSC; tRNA ( tmS GGA )         |
|                     | 31 | 108001 | P | 31 | 132559 | -1 | 1.36E-07 | IRb; rRNA ( rm 23 )           | IRa; rRNA ( rm 23 )           |
|                     | 31 | 108384 | P | 31 | 132942 | -1 | 1.36E-07 | IRb; rRNA ( rm 23 )           | IRa; rRNA ( rm 23 )           |
|                     | 34 | 107965 | P | 34 | 132592 | -3 | 3.70E-06 | IRb; rRNA ( rm 23 )           | IRa; rRNA ( rm 23 )           |
|                     | 34 | 107985 | P | 34 | 132572 | -3 | 3.70E-06 | IRb; rRNA ( rm 23 )           | IRa; rRNA ( rm 23 )           |
|                     | 34 | 108348 | P | 34 | 132975 | -3 | 3.70E-06 | IRb; rRNA ( rm 23 )           | IRa; rRNA ( rm 23 )           |

|    |        |   |    |        |    |          |                        |                        |
|----|--------|---|----|--------|----|----------|------------------------|------------------------|
| 34 | 108368 | P | 34 | 132955 | -3 | 3.70E-06 | IRb; rRNA ( rm 23 )    | IRa; rRNA ( rm 23 )    |
| 33 | 36427  | P | 33 | 45964  | -3 | 1.35E-05 | LSC; tRNA ( trnS UGA ) | LSC; tRNA ( trnS GGA ) |

---

Table S3 The tandem repeats distribution in the chloroplast genomes of four Orchidaceae species.

Table S3a The tandem repeats distribution in *Cremastra appendiculata* chloroplast genome.

| Tandem repeats | Indices        | Size(bp) | Repeat number | Start position | Region                        |
|----------------|----------------|----------|---------------|----------------|-------------------------------|
|                | 3825--4006     | 90       | 2             | 3825           | LSC;tRNA(trnK-UUU intron)     |
|                | 6139--6265     | 61       | 2             | 6139           | LSC;IGS(rps16-trnQ-UUG)       |
|                | 7061--7175     | 50       | 2             | 7061           | LSC;IGS(rps16-trnQ-UUG)       |
|                | 7838--8053     | 107      | 2             | 7838           | LSC;IGS(trnQ-UUG-psbK)        |
|                | 8605--8717     | 53       | 2             | 8605           | LSC;IGS(psbK-psbI)            |
|                | 8922--9075     | 67       | 2             | 8922           | LSC;IGS(psbI-trnS-GCU)        |
|                | 9496--9592     | 38       | 2             | 9496           | LSC;IGS(trnS-GCU-trnG-UCC)    |
|                | 9858--9957     | 43       | 2             | 9858           | LSC;IGS(trnS-GCU-trnG-UCC)    |
|                | 13876--13971   | 47       | 2             | 13876          | LSC;CDS(atpF intron)          |
|                | 23668--23780   | 54       | 2             | 23668          | LSC;CDS(rpoC1 intron)         |
|                | 29385--29678   | 146      | 2             | 29385          | LSC;IGS(trnC-GCA-petN)        |
|                | 30109--30514   | 203      | 2             | 30109          | LSC;IGS(petN-psbM)            |
|                | 33435--33576   | 70       | 2             | 33435          | LSC;IGS(trnT-GGU-psbD)        |
|                | 34078--34245   | 78       | 2             | 34078          | LSC;IGS(trnT-GGU-psbD)        |
|                | 37460--37647   | 95       | 2             | 37460          | LSC;IGS(lhbA-trnG-GCC)        |
|                | 37831--37958   | 62       | 2             | 37831          | LSC;IGS(trnG-GCC-trnM-CAU)    |
|                | 43517--43610   | 39       | 2             | 43517          | LSC;IGS(psaA-ycf3)            |
|                | 44684--44878   | 97       | 2             | 44684          | LSC;CDS(ycf3 intron)          |
|                | 46733--46870   | 69       | 2             | 46733          | LSC;IGS(trnS-GGA-rps4)        |
|                | 48079--48337   | 127      | 2             | 48079          | LSC;IGS(trnT-UGU-trnL-UAA)    |
|                | 49135--49185   | 23       | 2             | 49135          | LSC;tRNA(trnL-UAA intron)     |
|                | 50245--50443   | 100      | 2             | 50245          | LSC;IGS(trnF-GAA-ndhJ)        |
|                | 50519--50820   | 152      | 2             | 50519          | LSC;IGS(trnF-GAA-ndhJ)        |
|                | 55437--55553   | 52       | 2             | 55437          | LSC;IGS(atpB-rbcL)            |
|                | 64569--64789   | 109      | 2             | 64569          | LSC;IGS(petA-psbJ)            |
|                | 67079--67237   | 51       | 3             | 67079          | LSC;IGS(psbE-petL)            |
|                | 67039--67238   | 99       | 2             | 67039          | LSC;IGS(psbE-petL)            |
|                | 70778--70885   | 54       | 2             | 70778          | LSC;IGS(rpl20-clpP)           |
|                | 71211--71390   | 85       | 2             | 71211          | LSC;IGS(rpl20-clpP)           |
|                | 79705--79776   | 35       | 2             | 79705          | LSC;IGS(petB-petD)            |
|                | 89311--89357   | 22       | 2             | 89311          | IRB;IGS(rpl2-rpl23)           |
|                | 89517--89567   | 25       | 2             | 89517          | IRB;IGS,CDS(rpl2-rpl23,rpl23) |
|                | 96953--97003   | 25       | 2             | 96953          | IRB;CDS(ycf2)                 |
|                | 103493--103689 | 98       | 2             | 103493         | IRB;IGS(rps7-trnV-GAC)        |
|                | 115738--115922 | 93       | 2             | 115738         | SSC;IGS(rpl32-trnL-UAG)       |
|                | 116242--116398 | 65       | 2             | 116242         | SSC;IGS(rpl32-trnL-UAG)       |
|                | 122549--122749 | 99       | 2             | 122549         | SSC;IGS(ndhH-rps15)           |
|                | 123328--123447 | 58       | 2             | 123328         | SSC;IGS(rps15-ycf1)           |
|                | 124252--124416 | 50       | 3             | 124252         | SSC;IGS(rps15-ycf1)           |
|                | 124264--124464 | 98       | 2             | 124264         | SSC;IGS(rps15-ycf1)           |
|                | 125503--125727 | 112      | 2             | 125503         | SSC;IGS,CDS(rps15-ycf1,ycf1)  |
|                | 138730--138926 | 98       | 2             | 138730         | IRA;IGS(trnV-GAC-rps7)        |
|                | 145416--145466 | 25       | 2             | 145416         | IRA;CDS(ycf2)                 |
|                | 152852--152902 | 25       | 2             | 152852         | IRA;IGS,CDS(rpl23-rpl2,rpl23) |

Table S3b The tandem repeats distribution in *Calanthe davidii* chloroplast genome.

| Tandem repeats | Indices        | Size (bp) | Repeat number | Start position | Region                                |
|----------------|----------------|-----------|---------------|----------------|---------------------------------------|
|                | 14048--14168   | 59        | 2             | 14048          | LSC; IGS ( atpF-atpH )                |
|                | 14987--15031   | 22        | 2             | 14987          | LSC; IGS ( atpH-atpI )                |
|                | 32463--32771   | 156       | 2             | 32463          | LSC; IGS ( trnE-UUC-trnT-GGU )        |
|                | 33650--33813   | 78        | 2             | 33650          | LSC; IGS ( trnT-GGU-psbD )            |
|                | 42718--42908   | 96        | 2             | 42718          | LSC; IGS ( psaA-ycf3 )                |
|                | 45483--45705   | 111       | 2             | 45483          | LSC; IGS ( ycf3-trnS-GGA )            |
|                | 47551--47718   | 79        | 2             | 47551          | LSC; IGS ( trnT-UGU-trnL-UAA )        |
|                | 48284--48750   | 233       | 2             | 48284          | LSC; tRNA ( trnL-UAA intron )         |
|                | 49995--50116   | 45        | 3             | 49995          | LSC; IGS ( trnF-GAA-ndhJ )            |
|                | 50951--51138   | 94        | 2             | 50951          | LSC; CDS ( ndhK )                     |
|                | 54836--55090   | 116       | 2             | 54836          | LSC; IGS ( atpB-rbcL )                |
|                | 62488--62678   | 95        | 2             | 62488          | LSC; CDS, IGS ( cemA, cemA-petA )     |
|                | 73673--73787   | 50        | 2             | 73673          | LSC; IGS ( clpP-psbB )                |
|                | 83771--83920   | 75        | 2             | 83771          | LSC; CDS ( rpl16 intron )             |
|                | 86181--86266   | 39        | 2             | 86181          | IRb; IGS ( rpl22-rps19 )              |
|                | 91116--91219   | 52        | 2             | 91116          | IRb; IGS, CDS ( trnI-CAU-ycf2, ycf2 ) |
|                | 93946--94006   | 18        | 4             | 93946          | IRb; CDS ( ycf2 )                     |
|                | 102319--102372 | 21        | 3             | 102319         | IRb; IGS ( rps12-trnV-GAC )           |
|                | 102303--102380 | 35        | 2             | 102303         | IRb; IGS ( rps12-trnV-GAC )           |
|                | 111167--111312 | 72        | 2             | 111167         | IRb; IGS ( trnR-ACG-trnN-GUU )        |
|                | 114519--114708 | 93        | 2             | 114519         | SSC; IGS ( rpl32-trnL-UAG )           |
|                | 114960--115085 | 58        | 2             | 114960         | SSC; IGS ( rpl32-trnL-UAG )           |
|                | 123665--123790 | 63        | 2             | 123665         | SSC; CDS ( ycf1 )                     |
|                | 128363--128508 | 72        | 2             | 128363         | IRa; IGS ( trnN-GUU-trnR-ACG )        |
|                | 137303--137356 | 21        | 3             | 137303         | IRa; IGS ( trnV-GAC-rps12 )           |
|                | 137295--137372 | 35        | 2             | 137295         | IRa; IGS ( trnV-GAC-rps12 )           |
|                | 145669--145729 | 18        | 4             | 145669         | IRa; CDS ( ycf2 )                     |
|                | 148456--148559 | 52        | 2             | 148456         | IRb; CDS, IGS ( ycf2, ycf2-trnI-CAU ) |
|                | 153409--153494 | 39        | 2             | 153409         | IRa; IGS ( rps19-rpl22 )              |

Table S3c The tandem repeats distribution in *Epipactis mairei* chloroplast genome.

| Tandem repeats | Indices      | Size(bp) | Repeat number | Start position | Region                            |
|----------------|--------------|----------|---------------|----------------|-----------------------------------|
|                | 3431--3812   | 190      | 2             | 3431           | LSC; tRNA ( trnK-UUU intron )     |
|                | 6689--6835   | 71       | 2             | 6689           | LSC; IGS ( rps16-trnQ-UUG )       |
|                | 7906--8135   | 110      | 2             | 7906           | LSC; IGS ( psbK-psbI )            |
|                | 8952--9567   | 307      | 2             | 8952           | LSC; IGS ( trnS-GCU-trnG-GCC )    |
|                | 13135--13449 | 155      | 2             | 13135          | LSC; CDS ( atpF intron )          |
|                | 13980--14099 | 60       | 2             | 13980          | LSC; IGS ( atpF-atpH )            |
|                | 14356--14512 | 82       | 2             | 14356          | LSC; CDS, IGS ( atpH, atpH-atpI ) |
|                | 14939--15022 | 41       | 2             | 14939          | LSC; IGS ( atpH-atpI )            |
|                | 16079--16243 | 80       | 2             | 16079          | LSC; IGS, CDS ( atpI-rps2, rps2 ) |

|                |     |   |        |                                |
|----------------|-----|---|--------|--------------------------------|
| 28202--28501   | 151 | 2 | 28202  | LSC; IGS ( rpoB-trnC-GCA )     |
| 29829--29974   | 63  | 2 | 29829  | LSC; IGS ( petN-psbM )         |
| 32314--32571   | 128 | 2 | 32314  | LSC; IGS ( trnE-UUC-trnT-GGU ) |
| 33547--33681   | 68  | 2 | 33547  | LSC; IGS ( trnT-GGU-psbD )     |
| 43565--43742   | 88  | 2 | 43565  | LSC; CDS ( ycf3 intron1 )      |
| 45801--45908   | 41  | 3 | 45801  | LSC; IGS ( ycf3-trnS-GGA )     |
| 48352--48666   | 157 | 2 | 48352  | LSC; tRNA ( trnL-UAA intron )  |
| 54702--54835   | 67  | 2 | 54702  | LSC; IGS ( atpB-rbcL )         |
| 56812--56960   | 74  | 2 | 56812  | LSC; IGS ( rbcL-accD )         |
| 59081--59440   | 181 | 2 | 59081  | LSC; IGS ( accD-psaI )         |
| 61525--61615   | 47  | 2 | 61525  | LSC; IGS ( ycf4-cemA )         |
| 64158--64309   | 77  | 2 | 64158  | LSC; IGS ( petA-psbJ )         |
| 64354--64446   | 45  | 2 | 64354  | LSC; IGS ( petA-psbJ )         |
| 65756--65953   | 90  | 2 | 65756  | LSC; IGS ( psbE-petL )         |
| 68125--68346   | 104 | 2 | 68125  | LSC; IGS ( psaJ-rpl33 )        |
| 73317--73375   | 26  | 2 | 73317  | LSC; IGS ( clpP-psbB )         |
| 75451--75754   | 136 | 2 | 75451  | LSC; IGS ( psbB-psbT )         |
| 78943--79042   | 49  | 2 | 78942  | LSC; CDS ( petD intron )       |
| 83837--83932   | 45  | 2 | 83837  | LSC; CDS ( rpl16 intron )      |
| 86308--86353   | 23  | 2 | 86377  | IRb; CDS ( rps19 )             |
| 91539--91628   | 21  | 4 | 91539  | IRb; CDS ( ycf2 )              |
| 91560--91628   | 21  | 3 | 91560  | IRb; CDS ( ycf2 )              |
| 93990--94055   | 18  | 4 | 93990  | IRb; CDS ( ycf2 )              |
| 95902--95995   | 47  | 2 | 95902  | IRb; IGS ( ycf2-ycf15 )        |
| 99898--100099  | 100 | 2 | 99898  | IRb; IGS ( ndhB-rps7 )         |
| 102398--102513 | 54  | 2 | 102398 | IRb; IGS ( rps12-trnV-GAC )    |
| 102400--102534 | 54  | 3 | 102400 | IRb; IGS ( rps12-trnV-GAC )    |
| 111334--111403 | 34  | 2 | 111334 | IRb; IGS ( trnR-ACG-trnN-GUU ) |
| 114531--114643 | 47  | 2 | 114531 | SSC; IGS ( rpl32-trnL-UAG )    |
| 114539--114655 | 47  | 3 | 114539 | SSC; IGS ( rpl32-trnL-UAG )    |
| 115152--115285 | 62  | 2 | 115152 | SSC; IGS ( trnL-UAG-ccsA )     |
| 121174--121290 | 52  | 2 | 121174 | SSC; IGS ( ndhH-rps15 )        |
| 122640--122882 | 122 | 2 | 122640 | SSC; CDS ( ycf1 )              |
| 125537--125699 | 81  | 2 | 125537 | SSC; CDS ( ycf1 )              |
| 128362--128431 | 34  | 2 | 128362 | IRa; IGS ( trnN-GUU-trnR-ACG ) |
| 137252--137367 | 54  | 2 | 137252 | IRa; IGS ( trnV-GAC-rps12 )    |
| 139666--139867 | 100 | 2 | 139666 | IRa; IGS ( rps7-ndhB )         |
| 143770--143863 | 47  | 2 | 143770 | IRa; IGS ( ycf15-ycf2 )        |
| 145710--145775 | 18  | 4 | 145710 | IRa; CDS ( ycf2 )              |
| 148137--148205 | 21  | 3 | 148137 | IRa; CDS ( ycf2 )              |
| 148137--148226 | 21  | 4 | 148137 | IRa; CDS ( ycf2 )              |
| 153412--153457 | 23  | 2 | 153412 | IRa; CDS ( rps19 )             |

Table S3d The tandem repeats distribution in *Platanthera japonica* chloroplast genome.

| Tandem repeats | Indices    | Size(bp) | Repeat number | Start position | Region                     |
|----------------|------------|----------|---------------|----------------|----------------------------|
|                | 1339--1466 | 65       | 2             | 1339           | LSC; IGS ( psbA-trnK UUU ) |
|                | 1687--1845 | 80       | 2             | 1687           | LSC; tRNA ( trnK UUU )     |



|                |     |   |        |                                   |
|----------------|-----|---|--------|-----------------------------------|
| 4873--5064     | 94  | 2 | 4873   | LSC; IGS ( trnK UUU-rps16 )       |
| 7984--8084     | 50  | 2 | 7984   | LSC; IGS ( psbK-psbI )            |
| 8942--9781     | 420 | 2 | 8942   | LSC; IGS ( trnS GCU-trnG GCC )    |
| 13168--13242   | 37  | 2 | 13168  | LSC; CDS ( atpF intron )          |
| 13965--14053   | 39  | 2 | 13965  | LSC; IGS ( atpF-atpH )            |
| 14367--14720   | 177 | 2 | 14367  | LSC; IGS ( atpH-atpI )            |
| 14819--14906   | 44  | 2 | 14819  | LSC; IGS ( atpH-atpI )            |
| 16015--16088   | 37  | 2 | 16015  | LSC; IGS ( atpI-rps2 )            |
| 28123--28287   | 83  | 2 | 28123  | LSC; IGS ( rpoB-trnC GCA )        |
| 28433--28642   | 105 | 2 | 28433  | LSC; IGS ( rpoB-trnC GCA )        |
| 29811--29878   | 32  | 2 | 29811  | LSC; CDS, IGS ( petN, petN-psbM ) |
| 29919--30266   | 174 | 2 | 29919  | LSC; IGS ( petN-psbM )            |
| 31040--31539   | 250 | 2 | 31040  | LSC; IGS ( psbM-trnD GUC )        |
| 33615--33700   | 45  | 2 | 33615  | LSC; IGS ( trnD GUC-psbD )        |
| 37304--37438   | 69  | 2 | 37304  | LSC; IGS ( trnG UCC-trnfM CAU )   |
| 46934--47026   | 44  | 2 | 46934  | LSC; IGS ( rps4-trnT UGU )        |
| 47729--47921   | 90  | 2 | 47729  | LSC; IGS ( trnT UGU-trnL UAA )    |
| 48299--48599   | 152 | 2 | 48299  | LSC; tRNA ( trnL UAA intron )     |
| 48917--49204   | 143 | 2 | 48917  | LSC; IGS ( trnL UAA-trnF GAA )    |
| 49447--49595   | 74  | 2 | 49447  | LSC; IGS ( trnF GAA-ndhJ )        |
| 54480--54954   | 245 | 2 | 54480  | LSC; IGS ( atpB-rbcL )            |
| 56782--56950   | 83  | 2 | 56782  | LSC; IGS ( rbcL-accD )            |
| 57204--57357   | 76  | 2 | 57204  | LSC; IGS ( rbcL-accD )            |
| 59467--59643   | 89  | 2 | 59467  | LSC; IGS ( accD-psaI )            |
| 60854--61140   | 142 | 2 | 60854  | LSC; IGS ( ycf4-cemA )            |
| 63587--63970   | 194 | 2 | 63587  | LSC; IGS ( petA-psbJ )            |
| 69771--69953   | 89  | 2 | 69771  | LSC; IGS ( rpl20-rps12 )          |
| 72570--72683   | 55  | 2 | 72570  | LSC; CDS ( clpP intron2 )         |
| 73534--73712   | 86  | 2 | 73534  | LSC; IGS ( clpP-psbB )            |
| 78893--79060   | 79  | 2 | 78893  | LSC; CDS ( petD intron )          |
| 86085--86206   | 60  | 2 | 86085  | IRb; IGS ( rpl22-rps19 )          |
| 93362--93444   | 42  | 2 | 93362  | IRb; CDS ( ycf2 )                 |
| 93908--93967   | 24  | 2 | 93908  | IRb; CDS ( ycf2 )                 |
| 101395--102148 | 378 | 2 | 101395 | IRb; IGS ( rps12-trnV GAC )       |
| 102201--102353 | 76  | 2 | 102201 | IRb; IGS ( rps12-trnV GAC )       |
| 102952--103021 | 36  | 2 | 102952 | IRb; IGS ( rps12-trnV GAC )       |
| 105707--105852 | 71  | 2 | 105707 | IRb; tRNA ( trnI GAU intron )     |
| 112076--112141 | 33  | 2 | 112076 | IRb; IGS ( trnR ACG-trnN GUU )    |
| 114400--114485 | 36  | 2 | 114400 | SSC; IGS ( ndhF-rpl32 )           |
| 115089--115309 | 109 | 2 | 115089 | SSC; IGS ( ndhF-rpl32 )           |
| 115855--115951 | 46  | 2 | 115855 | SSC; IGS ( trnL UAG-ccsA )        |
| 123805--123899 | 48  | 2 | 123805 | SSC; CDS ( ycf1 )                 |
| 126123--126338 | 105 | 2 | 126123 | SSC; CDS ( ycf1 )                 |
| 127248--127393 | 69  | 2 | 127248 | SSC; CDS ( ycf1 )                 |
| 128834--128899 | 33  | 2 | 128834 | IRa; IGS ( trnN GUU-trnR ACG )    |
| 135123--135268 | 71  | 2 | 135123 | IRa; tRNA ( trnI GAU intron )     |
| 137954--138023 | 36  | 2 | 137954 | IRa; IGS ( trnV GAC-rps12 )       |
| 138622--138774 | 76  | 2 | 138622 | IRa; IGS ( trnV GAC-rps12 )       |
| 138827--139580 | 378 | 2 | 138827 | IRa; IGS ( trnV GAC-rps12 )       |

|                |    |   |        |                   |
|----------------|----|---|--------|-------------------|
| 147008--147067 | 24 | 3 | 147008 | IRa; CDS ( ycf2 ) |
| 154769--154890 | 60 | 2 | 154769 | IRa CDS ( ycf2 )  |

---

Table S4 Simple sequence repeats in the chloroplast genomes of four Orchidaceae species.

Table S4a Simple sequence repeats in *Cremastra appendiculata* chloroplast genome.

| SSR type | SSR                                                                         | size | start  | end    | Location                   | Region |
|----------|-----------------------------------------------------------------------------|------|--------|--------|----------------------------|--------|
| p1       | (T)10                                                                       | 10   | 2140   | 2149   | trnK-UUU intron            | LSC    |
| p1       | (A)11                                                                       | 11   | 6854   | 6864   | rps16-trnQ-UUG IGS         | LSC    |
| p1       | (T)11                                                                       | 11   | 10358  | 10368  | trnG-GCC intron            | LSC    |
| p1       | (T)12                                                                       | 12   | 29783  | 29794  | trnC-GCA-petN IGS          | LSC    |
| p1       | (A)11                                                                       | 11   | 33336  | 33346  | trnT-GGU-psbD IGS          | LSC    |
| p1       | (A)10                                                                       | 10   | 45790  | 45799  | ycf3 intron2               | LSC    |
| p1       | (T)10                                                                       | 10   | 55767  | 55776  | atpB-rbcL IGS              | LSC    |
| p1       | (A)10                                                                       | 10   | 57646  | 57655  | rbcL-accD IGS              | LSC    |
| p1       | (A)10                                                                       | 10   | 65870  | 65879  | psbF CDS                   | LSC    |
| p1       | (T)10                                                                       | 10   | 70290  | 70299  | rps18-rpl20, rpl20 IGS-CDS | LSC    |
| p1       | (T)11                                                                       | 11   | 72335  | 72345  | clpP intron2               | LSC    |
| p1       | (T)10                                                                       | 10   | 104181 | 104190 | rps12-trnV-GAC IGS         | IRb    |
| p1       | (T)10                                                                       | 10   | 115837 | 115846 | rpl32-trnL-UAG IGS         | SSC    |
| p1       | (A)10                                                                       | 10   | 126330 | 126339 | ycf1 CDS                   | SSC    |
| p1       | (T)10                                                                       | 10   | 127729 | 127738 | ycf1 CDS                   | SSC    |
| p1       | (A)12                                                                       | 12   | 127890 | 127901 | ycf1 CDS                   | SSC    |
| p1       | (A)10                                                                       | 10   | 138229 | 138238 | trnV-GAC-rps12 IGS         | IRa    |
| p2       | (AT)5                                                                       | 10   | 522    | 531    | rps19-psbA IGS             | LSC    |
| p2       | (TA)5                                                                       | 10   | 11191  | 11200  | trnR-UCU-atpA              | LSC    |
| p2       | (AT)5                                                                       | 10   | 20954  | 20963  | rpoC2 CDS                  | LSC    |
| p2       | (TA)5                                                                       | 10   | 30178  | 30187  | petN-psbM IGS              | LSC    |
| p2       | (TA)5                                                                       | 10   | 30381  | 30390  | petN-psbM IGS              | LSC    |
| p2       | (AT)5                                                                       | 10   | 30579  | 30588  | petN-psbM IGS              | LSC    |
| p2       | (AT)5                                                                       | 10   | 43553  | 43562  | psaA-ycf3 IGS              | LSC    |
| p2       | (TA)5                                                                       | 10   | 44368  | 44377  | ycf3 intron1               | LSC    |
| p2       | (AT)9                                                                       | 18   | 48117  | 48134  | trnT-UGU-trnL-UAA IGS      | LSC    |
| p2       | (AT)9                                                                       | 18   | 48244  | 48261  | trnT-UGU-trnL-UAA IGS      | LSC    |
| p2       | (AT)5                                                                       | 10   | 48391  | 48400  | trnT-UGU-trnL-UAA IGS      | LSC    |
| p2       | (AT)6                                                                       | 12   | 61877  | 61888  | ycf4-cemA IGS              | LSC    |
| p2       | (TA)6                                                                       | 12   | 74099  | 74110  | clpP-psbB IGS              | LSC    |
| p2       | (TA)6                                                                       | 12   | 76323  | 76334  | psbB-psbT IGS              | LSC    |
| p2       | (TA)7                                                                       | 14   | 83427  | 83440  | rps8-rpl14 IGS             | LSC    |
| p2       | (GA)5                                                                       | 10   | 93338  | 93347  | ycf2 CDS                   | IRb    |
| p2       | (TA)8                                                                       | 16   | 119556 | 119571 | psaC-ndhE IGS              | SSC    |
| p2       | (TC)5                                                                       | 10   | 149072 | 149081 | ycf2 CDS                   | IRa    |
| p4       | (ACTA)3                                                                     | 12   | 7007   | 7018   | rps16-trnQ-UUG IGS         | LSC    |
| p4       | (GTCT)3                                                                     | 12   | 12350  | 12361  | atpA CDS                   | LSC    |
| p4       | (ATTA)3                                                                     | 12   | 69028  | 69039  | psaJ-rpl33 IGS             | LSC    |
| p4       | (AAAT)3                                                                     | 12   | 70009  | 70020  | rps18,rps18-rpl20 CDS-IGS  | LSC    |
| p5       | (TACT)3                                                                     | 15   | 37536  | 37550  | psbZ-trnG-UCC IGS          | LSC    |
| p5       | (TTCTA)3                                                                    | 15   | 73478  | 73492  | clpP intron2               | LSC    |
| p6       | (TATTTA)3                                                                   | 18   | 36801  | 36818  | psbC-trnS-UGA IGS          | LSC    |
| c        | (A)11ggaagttttttcatctta<br>tatcattatagaatgaaatttc<br>(A)11ggaagttttttcatctt | 174  | 8631   | 8804   | psbK-psbI IGS              | LSC    |

|   |                                                                                                                                                                                                                  |     |        |        |                       |     |
|---|------------------------------------------------------------------------------------------------------------------------------------------------------------------------------------------------------------------|-----|--------|--------|-----------------------|-----|
| c | tatcttagagtgcatacaaa<br>Atagtgtatagtgtgtcgtaa<br>aataggatctatttcctaaa<br>aaaaatg(ATCTT)3<br>(TA)10tcagtcaagtgaatc<br>ttgtctgatggaagagtaa<br>caaggtaatcttgaacaattc<br>aatgcatttc(T)10                             | 99  | 32976  | 33074  | trnE-UUC-trnT-GGU IGS | LSC |
| c | (TA)6tctttctatctttaatat<br>ttttatctttactattagatat(TA)6<br>(AAT)4acaatataaatataga<br>agaaatag(AATA)3<br>(A)12taaaaaagaacaagga<br>taataagaaactcaagaaga<br>aatgaaatttaattaacgagtttc<br>atgaatttctaaaatgaaaatct(A)12 | 64  | 55452  | 55515  | atpB-rbcL IGS         | LSC |
| c |                                                                                                                                                                                                                  | 48  | 76451  | 76498  | psbB-psbT IGS         | LSC |
| c |                                                                                                                                                                                                                  | 111 | 122578 | 122688 | ndhH-rps15 IGS        | SSC |

Table S4b Simple sequence repeats in *Calanthe davidii* chloroplast genome.

| SSR type | SSR   | size | start  | end    | Location              | Region |
|----------|-------|------|--------|--------|-----------------------|--------|
| p1       | (T)10 | 10   | 1568   | 1577   | psbA-trnK-UUU IGS     | LSC    |
| p1       | (T)10 | 10   | 1858   | 1867   | trnK-UUU intron       | LSC    |
| p1       | (A)11 | 11   | 6553   | 6563   | rps16-trnQ-UUG IGS    | LSC    |
| p1       | (A)10 | 10   | 9586   | 9595   | trnS-GCU-trnG-GCC IGS | LSC    |
| p1       | (A)10 | 10   | 16009  | 16018  | atpI-rps2 IGS         | LSC    |
| p1       | (T)12 | 12   | 16910  | 16921  | rps2-rpoC2 IGS        | LSC    |
| p1       | (T)10 | 10   | 29288  | 29297  | trnC-GCA-petN IGS     | LSC    |
| p1       | (A)10 | 10   | 32996  | 33005  | trnT-GGU-psbD IGS     | LSC    |
| p1       | (T)11 | 11   | 43147  | 43157  | psaA-ycf3 IGS         | LSC    |
| p1       | (T)10 | 10   | 49010  | 49019  | trnL-UAA-trnF-GAA IGS | LSC    |
| p1       | (A)10 | 10   | 51167  | 51176  | ndhC CDS              | LSC    |
| p1       | (A)10 | 10   | 59223  | 59232  | accD CDS              | LSC    |
| p1       | (A)13 | 13   | 61198  | 61210  | ycf4-cemA IGS         | LSC    |
| p1       | (T)10 | 10   | 63846  | 63855  | petA-psbJ IGS         | LSC    |
| p1       | (T)10 | 10   | 66536  | 66545  | psbE-petL IGS         | LSC    |
| p1       | (A)11 | 11   | 77142  | 77152  | petB intron           | LSC    |
| p1       | (T)11 | 11   | 78533  | 78543  | petD intron           | LSC    |
| p1       | (T)17 | 17   | 81626  | 81642  | rpl36-infA IGS        | LSC    |
| p1       | (T)10 | 10   | 82534  | 82543  | rps8-rpl14 IGS        | LSC    |
| p1       | (T)12 | 12   | 84789  | 84800  | rpl16 intron          | LSC    |
| p1       | (T)10 | 10   | 116462 | 116471 | ccsA-ndhD IGS         | SSC    |
| p1       | (A)11 | 11   | 119047 | 119057 | ndhG-ndhI             | SSC    |
| p1       | (T)10 | 10   | 122821 | 122830 | ycf1 CDS              | SSC    |
| p1       | (A)10 | 10   | 124816 | 124825 | ycf1 CDS              | SSC    |
| p1       | (T)14 | 14   | 126130 | 126143 | ycf1 CDS              | SSC    |
| p1       | (T)10 | 10   | 126251 | 126260 | ycf1 CDS              | SSC    |
| p2       | (TA)7 | 14   | 5564   | 5577   | rps16 intron          | LSC    |
| p2       | (AT)5 | 10   | 20506  | 20515  | rpoC2 CDS             | LSC    |
| p2       | (TA)5 | 10   | 54864  | 54873  | atpB-rbcL IGS         | LSC    |
| p2       | (TA)5 | 10   | 54980  | 54989  | atpB-rbcL IGS         | LSC    |

|    |                                                                                                                                                                                                                                                              |     |        |        |                         |     |
|----|--------------------------------------------------------------------------------------------------------------------------------------------------------------------------------------------------------------------------------------------------------------|-----|--------|--------|-------------------------|-----|
| p2 | (TA)5                                                                                                                                                                                                                                                        | 10  | 64339  | 64348  | petA-psbJ IGS           | LSC |
| p2 | (TA)6                                                                                                                                                                                                                                                        | 12  | 75757  | 75768  | psbB-psbT IGS           | LSC |
| p2 | (GA)5                                                                                                                                                                                                                                                        | 10  | 92159  | 92168  | ycf2 CDS                | IRb |
| p2 | (TC)5                                                                                                                                                                                                                                                        | 10  | 147507 | 147516 | ycf2 CDS                | IRa |
| p3 | (TTC)4                                                                                                                                                                                                                                                       | 12  | 3634   | 3645   | trnK-UUU intron         | LSC |
| p3 | (AAT)4                                                                                                                                                                                                                                                       | 12  | 118442 | 118453 | psaC-ndhE IGS           | SSC |
| p4 | (GTCT)3                                                                                                                                                                                                                                                      | 12  | 11884  | 11895  | atpA CDS                | LSC |
| p4 | (TTTA)3                                                                                                                                                                                                                                                      | 12  | 28577  | 28588  | rpoB-trnC-GCA IGS       | LSC |
| p4 | (ATTA)3                                                                                                                                                                                                                                                      | 12  | 68307  | 68318  | psaJ-rpl33 IGS          | LSC |
| p4 | (TTTA)3                                                                                                                                                                                                                                                      | 12  | 79739  | 79750  | petD-rpoA IGS           | LSC |
| p4 | (TTGA)3                                                                                                                                                                                                                                                      | 12  | 118604 | 118615 | ndhE CDS                | SSC |
| p5 | (ATCTT)3                                                                                                                                                                                                                                                     | 15  | 8330   | 8344   | trnS-GCU-trnG-GCC IGS   | LSC |
| c  | (TCTA)3ttatctat(ATAG)4<br>(T)10ccattcctggtgatcaaaa<br>Tgccactgtgcctagatattttatccac<br>Cctccagaaaatgaatatctccaga<br>aaatatttcagttccatac(T)11                                                                                                                  | 36  | 5356   | 5391   | rps16 intron            | LSC |
| c  | (AT)5cataatggaagatgaagatgc<br>ctaattcatgaattg(A)11                                                                                                                                                                                                           | 117 | 19021  | 19137  | rpoC2 CDS               | LSC |
| c  | (CTA)4aaatttctat(ACAAA)3<br>(AATG)3aataatttattagatctttt<br>Ctttatacttctaccttatttactcaaggt<br>Attcttagctatagtagtaattctatcattc<br>(AATG)3<br>(TG)5attttccaagtagcggaaga<br>Gtaagaactttacatcttaacatatataat<br>Acaaaccaaatcctattttggtcgaatct<br>taaatgaataag(A)10 | 57  | 32799  | 32855  | trnE-UUC-trnT-GGU IGS   | LSC |
| c  | (A)10tcaatgtattgattccagtcctatt<br>tc(T)11                                                                                                                                                                                                                    | 37  | 51331  | 51367  | ndhC-trnV-UAC IGS       | LSC |
| c  | (T)11ccatcactgtacatgg(A)12                                                                                                                                                                                                                                   | 107 | 62505  | 62611  | cemA, cemA-petA CDS-IGS | LSC |
| c  | (A)10tcaatgtattgattccagtcctatt<br>tc(T)11                                                                                                                                                                                                                    | 113 | 68800  | 68912  | rpl33-rps18 IGS         | LSC |
| c  | (T)11ccatcactgtacatgg(A)12                                                                                                                                                                                                                                   | 48  | 72213  | 72260  | clpP intron2            | LSC |
| c  | (T)11ccatcactgtacatgg(A)12                                                                                                                                                                                                                                   | 40  | 126384 | 126423 | ycf1 CDS                | SSC |

Table S4c Simple sequence repeats in *Epipactis mairei* chloroplast genome.

| SSR type | SSR   | size | start | end   | Location              | Region |
|----------|-------|------|-------|-------|-----------------------|--------|
| p1       | (A)13 | 13   | 4055  | 4067  | trnK-UUU intron       | LSC    |
| p1       | (A)10 | 10   | 4946  | 4955  | trnK-UUU-rps16 IGS    | LSC    |
| p1       | (A)11 | 11   | 8247  | 8257  | psbK-psbI IGS         | LSC    |
| p1       | (T)11 | 11   | 9881  | 9891  | trnG-GCC intron       | LSC    |
| p1       | (A)13 | 13   | 14778 | 14790 | atpH-atpI IGS         | LSC    |
| p1       | (T)11 | 11   | 23662 | 23672 | rpoC1 intron          | LSC    |
| p1       | (A)12 | 12   | 32741 | 32752 | trnE-UUC-trnT-GGU IGS | LSC    |
| p1       | (A)12 | 12   | 32894 | 32905 | trnT-GGU-psbD IGS     | LSC    |
| p1       | (T)11 | 11   | 36325 | 36335 | psbC-trnS-UGA IGS     | LSC    |
| p1       | (T)11 | 11   | 36682 | 36692 | trnS-UGA-psbZ IGS     | LSC    |
| p1       | (A)11 | 11   | 47634 | 47644 | trnT-UGU-trnL-UAA IGS | LSC    |
| p1       | (A)11 | 11   | 48199 | 48209 | trnL-UAA intron       | LSC    |
| p1       | (T)10 | 10   | 48965 | 48974 | trnL-UAA-trnF-GAA IGS | LSC    |
| p1       | (T)10 | 10   | 56772 | 56781 | rbcL-accD IGS         | LSC    |
| p1       | (T)10 | 10   | 57318 | 57327 | rbcL-accD IGS         | LSC    |

|    |                                                                                                                                                                                                                                          |     |        |        |                       |     |
|----|------------------------------------------------------------------------------------------------------------------------------------------------------------------------------------------------------------------------------------------|-----|--------|--------|-----------------------|-----|
| p1 | (T)11                                                                                                                                                                                                                                    | 11  | 60176  | 60186  | psaI-ycf4 IGS         | LSC |
| p1 | (T)12                                                                                                                                                                                                                                    | 12  | 67519  | 67530  | trnP-UGG-psaJ IGS     | LSC |
| p1 | (A)12                                                                                                                                                                                                                                    | 12  | 68333  | 68344  | psaJ-rpl33 IGS        | LSC |
| p1 | (A)11                                                                                                                                                                                                                                    | 11  | 71643  | 71653  | clpP intron1          | LSC |
| p1 | (T)14                                                                                                                                                                                                                                    | 14  | 72450  | 72463  | clpP intron2          | LSC |
| p1 | (T)12                                                                                                                                                                                                                                    | 12  | 81639  | 81650  | rpl36-infA IGS        | LSC |
| p1 | (T)10                                                                                                                                                                                                                                    | 10  | 84593  | 84602  | rpl16 intron          | LSC |
| p1 | (T)10                                                                                                                                                                                                                                    | 10  | 84789  | 84798  | rpl16 intron          | LSC |
| p1 | (A)10                                                                                                                                                                                                                                    | 10  | 84940  | 84949  | rpl16-rps3 IGS        | LSC |
| p1 | (T)12                                                                                                                                                                                                                                    | 12  | 85709  | 85720  | rps3-rpl22 IGS        | LSC |
| p1 | (T)14                                                                                                                                                                                                                                    | 14  | 103084 | 103097 | rps12-trnV-GAC IGS    | IRb |
| p1 | (T)13                                                                                                                                                                                                                                    | 13  | 114011 | 114023 | ndhF-rpl32 IGS        | SSC |
| p1 | (T)10                                                                                                                                                                                                                                    | 10  | 115830 | 115839 | ccsA CDS              | SSC |
| p1 | (T)11                                                                                                                                                                                                                                    | 11  | 119339 | 119349 | ndhA intron           | SSC |
| p1 | (T)10                                                                                                                                                                                                                                    | 10  | 126209 | 126218 | ycf1 CDS              | SSC |
| p1 | (A)12                                                                                                                                                                                                                                    | 12  | 126370 | 126381 | ycf1 CDS              | SSC |
| p1 | (A)14                                                                                                                                                                                                                                    | 14  | 136668 | 136681 | trnV-GAC-rps12 IGS    | IRa |
| p2 | (AT)5                                                                                                                                                                                                                                    | 10  | 20557  | 20566  | rpoC2 CDS             | LSC |
| p2 | (TA)5                                                                                                                                                                                                                                    | 10  | 47093  | 47102  | rps4-trnT-UGU IGS     | LSC |
| p2 | (AT)5                                                                                                                                                                                                                                    | 10  | 73469  | 73478  | clpP-psbB IGS         | LSC |
| p2 | (TA)7                                                                                                                                                                                                                                    | 14  | 75698  | 75711  | psbB-psbT IGS         | LSC |
| p2 | (GA)5                                                                                                                                                                                                                                    | 10  | 92203  | 92212  | ycf2 CDS              | IRb |
| p2 | (TC)5                                                                                                                                                                                                                                    | 10  | 147553 | 147562 | ycf2 CDS              | IRa |
| p3 | (ATT)4                                                                                                                                                                                                                                   | 12  | 84343  | 84354  | rpl16 intron          | LSC |
| p4 | (AAAT)3                                                                                                                                                                                                                                  | 12  | 9107   | 9118   | trnS-GCU-trnG-GCC IGS | LSC |
| p4 | (AAAT)3                                                                                                                                                                                                                                  | 12  | 9414   | 9425   | trnS-GCU-trnG-GCC IGS | LSC |
| p4 | (TCTA)3                                                                                                                                                                                                                                  | 12  | 10700  | 10711  | trnR-UCU-atpA IGS     | LSC |
| p4 | (GTCT)3                                                                                                                                                                                                                                  | 12  | 11865  | 11876  | atpA CDS              | LSC |
| p4 | (AATG)3                                                                                                                                                                                                                                  | 12  | 62383  | 62394  | cemA CDS              | LSC |
| p4 | (TAAA)3                                                                                                                                                                                                                                  | 12  | 73693  | 73704  | clpP-psbB IGS         | LSC |
| p4 | (GAAT)3                                                                                                                                                                                                                                  | 12  | 123626 | 123637 | ycf1 CDS              | SSC |
| p5 | (TTCTA)3                                                                                                                                                                                                                                 | 15  | 114623 | 114637 | rpl32-trnL-UAG IGS    | SSC |
| c  | (A)11gaaatc(T)11                                                                                                                                                                                                                         | 28  | 1535   | 1562   | psbA-trnK-UUU IGS     | LSC |
| c  | (T)10catg(A)10<br>(TATC)3gatagataaatgtttatcc<br>Ggaaagtatttcaacttaaatcaacccat<br>atTTTTcatatgaagaaaataacatg(A)<br>10caaatcagtttaagcaaacattttac<br>Atcttcaacagatctttcgggattgtcca<br>tcataaaaatccctct(A)11<br>(A)10gtaattcaataatgacttacaac | 181 | 6331   | 6511   | rps16-trnQ-UUG IGS    | LSC |
| c  | aacc(A)15gacttataacttttagtacac<br>tattcaattgactaaacttttgta(T)10<br>(TCT)4taatgataagatattcaaaaca                                                                                                                                          | 110 | 9573   | 9682   | trnS-GCU-trnG-GCC IGS | LSC |
| c  | Tagtcatataactccaacaaagagattc<br>accaaaaacgaactaa(TCT)4<br>(T)10ccattcctgggtgataacaatgc                                                                                                                                                   | 92  | 16134  | 16225  | atpI-rps2 IGS         | LSC |
| c  | Cactgtgcctagatattttccacctctcc<br>Aggaaatgaatatctccagaaaaatttt                                                                                                                                                                            | 117 | 19063  | 19179  | rpoC2 CDS             | LSC |

|   |                                                                                                                          |     |        |        |                |     |
|---|--------------------------------------------------------------------------------------------------------------------------|-----|--------|--------|----------------|-----|
| c | cagttccatac(T)11<br>(T)10a(CT)5                                                                                          | 21  | 71482  | 71502  | clpP intron1   | LSC |
| c | (TA)16tttttatgtataataataatagatat<br>aatcaaaagaatatagaagaaatagaat<br>agtaataagatatgactataac(TA)7                          | 125 | 75451  | 75575  | psbB-psbT IGS  | LSC |
| c | (T)21aattatgaaattataaaaaattattag<br>aaattaaagtatatgcatgagacacaatct<br>attaatcggatctcttcagatatttgaatattc<br>tattattc(TA)5 | 131 | 82537  | 82667  | rps8-rpl14 IGS | LSC |
| c | (CAT)4gtattagaatgttacacagtgata<br>tatttttactttcatccacaaatattgtacaag<br>atatgtaggaaatacactataa(T)13                       | 106 | 121830 | 121935 | rps15-ycf1 IGS | SSC |
| c | (TTCT)3ttaaaaatttataacttgtaaaa<br>attgcttttaacctttta(T)11gagttcttta<br>gaaataggttc(A)10                                  | 98  | 124653 | 124750 | ycf1 CDS       | SSC |

Table S4d Simple sequence repeats in *Platanthera japonica* chloroplast genome.

| SSR type | SSR   | size | start | end   | Location               | Region |
|----------|-------|------|-------|-------|------------------------|--------|
| p1       | (T)12 | 12   | 1478  | 1489  | psbA-trnK UUU IGS      | LSC    |
| p1       | (A)12 | 12   | 1646  | 1657  | trnK UUU intron        | LSC    |
| p1       | (T)11 | 11   | 4429  | 4439  | trnK UUU intron        | LSC    |
| p1       | (T)11 | 11   | 6423  | 6433  | rps16-trnQ UUG IGS     | LSC    |
| p1       | (T)11 | 11   | 7058  | 7068  | rps16-trnQ UUG IGS     | LSC    |
| p1       | (A)16 | 16   | 7581  | 7596  | trnQ UUG-psbK IGS      | LSC    |
| p1       | (T)11 | 11   | 9277  | 9287  | trnS GCU-trnG GCC IGS  | LSC    |
| p1       | (T)11 | 11   | 9697  | 9707  | trnS GCU-trnG GCC IGS  | LSC    |
| p1       | (T)11 | 11   | 9906  | 9916  | trnG GCC intron        | LSC    |
| p1       | (A)13 | 13   | 13156 | 13168 | atpF intron            | LSC    |
| p1       | (A)12 | 12   | 29781 | 29792 | petN CDS               | LSC    |
| p1       | (A)10 | 10   | 30969 | 30978 | psbM-trnD GUC IGS      | LSC    |
| p1       | (A)14 | 14   | 32463 | 32476 | trnE UUC-trnT GGU IGS  | LSC    |
| p1       | (A)10 | 10   | 32926 | 32935 | trnT GGU-psbD IGS      | LSC    |
| p1       | (A)11 | 11   | 37461 | 37471 | trnG UCC-trnfM CAU IGS | LSC    |
| p1       | (A)16 | 16   | 38138 | 38153 | rps14-psaB IGS         | LSC    |
| p1       | (T)10 | 10   | 42910 | 42919 | psaA CDS               | LSC    |
| p1       | (T)10 | 10   | 43064 | 43073 | psaA-ycf3 IGS          | LSC    |
| p1       | (T)11 | 11   | 45103 | 45113 | ycf3 intron            | LSC    |
| p1       | (A)10 | 10   | 46928 | 46937 | rps4-trnT UGU IGS      | LSC    |
| p1       | (A)10 | 10   | 47510 | 47519 | trnT UGU-trnL UAA IGS  | LSC    |
| p1       | (A)13 | 13   | 48139 | 48151 | trnL UAA intron        | LSC    |
| p1       | (A)11 | 11   | 51728 | 51738 | trnV UAC intron        | LSC    |
| p1       | (A)10 | 10   | 56715 | 56724 | rbcL-accD IGS          | LSC    |
| p1       | (A)10 | 10   | 57444 | 57453 | rbcL-accD IGS          | LSC    |
| p1       | (A)12 | 12   | 58986 | 58997 | accD-psaI IGS          | LSC    |
| p1       | (T)10 | 10   | 67229 | 67238 | trnP UGG-psaJ IGS      | LSC    |
| p1       | (T)11 | 11   | 67348 | 67358 | trnP UGG-psaJ IGS      | LSC    |
| p1       | (A)15 | 15   | 68263 | 68277 | psaJ-rpl33 IGS         | LSC    |
| p1       | (A)10 | 10   | 68622 | 68631 | rpl33-rps18 IGS        | LSC    |
| p1       | (T)10 | 10   | 69187 | 69196 | rps18-rpl20 IGS        | LSC    |

|    |                                                                                                                                                                                                                                                                                                                                                         |     |        |        |                         |     |
|----|---------------------------------------------------------------------------------------------------------------------------------------------------------------------------------------------------------------------------------------------------------------------------------------------------------------------------------------------------------|-----|--------|--------|-------------------------|-----|
| p1 | (T)10                                                                                                                                                                                                                                                                                                                                                   | 10  | 70496  | 70505  | rpl20-rps12 IGS         | LSC |
| p1 | (A)11                                                                                                                                                                                                                                                                                                                                                   | 11  | 71218  | 71228  | clpP intron1            | LSC |
| p1 | (T)12                                                                                                                                                                                                                                                                                                                                                   | 12  | 72368  | 72379  | clpP intron2            | LSC |
| p1 | (T)14                                                                                                                                                                                                                                                                                                                                                   | 14  | 76108  | 76121  | psbN-psbH IGS           | LSC |
| p1 | (A)10                                                                                                                                                                                                                                                                                                                                                   | 10  | 77056  | 77065  | psbH-petB IGS           | LSC |
| p1 | (A)10                                                                                                                                                                                                                                                                                                                                                   | 10  | 79747  | 79756  | petD-rpoA IGS           | LSC |
| p1 | (T)16                                                                                                                                                                                                                                                                                                                                                   | 16  | 81597  | 81612  | rpl36-infA IGS          | LSC |
| p1 | (A)11                                                                                                                                                                                                                                                                                                                                                   | 11  | 84032  | 84042  | rpl16 intron            | LSC |
| p1 | (T)11                                                                                                                                                                                                                                                                                                                                                   | 11  | 84693  | 84703  | rpl16 intron            | LSC |
| p1 | (T)10                                                                                                                                                                                                                                                                                                                                                   | 10  | 85433  | 85442  | rps3 CDS                | LSC |
| p1 | (T)11                                                                                                                                                                                                                                                                                                                                                   | 11  | 116518 | 116528 | ccsA CDS                | SSC |
| p1 | (T)11                                                                                                                                                                                                                                                                                                                                                   | 11  | 117140 | 117150 | ccsA-ndhD IGS           | SSC |
| p1 | (T)13                                                                                                                                                                                                                                                                                                                                                   | 13  | 118927 | 118939 | psaC-ndhE IGS           | SSC |
| p1 | (T)12                                                                                                                                                                                                                                                                                                                                                   | 12  | 119155 | 119166 | psaC-ndhE IGS           | SSC |
| p1 | (T)12                                                                                                                                                                                                                                                                                                                                                   | 12  | 123590 | 123601 | ycf1 CDS                | SSC |
| p1 | (T)10                                                                                                                                                                                                                                                                                                                                                   | 10  | 124414 | 124423 | ycf1 CDS                | SSC |
| p1 | (A)10                                                                                                                                                                                                                                                                                                                                                   | 10  | 124739 | 124748 | ycf1 CDS                | SSC |
| p1 | (T)10                                                                                                                                                                                                                                                                                                                                                   | 10  | 125218 | 125227 | ycf1 CDS                | SSC |
| p1 | (T)15                                                                                                                                                                                                                                                                                                                                                   | 15  | 126773 | 126787 | ycf1 CDS                | SSC |
| p1 | (T)10                                                                                                                                                                                                                                                                                                                                                   | 10  | 126894 | 126903 | ycf1 CDS                | SSC |
| p1 | (A)12                                                                                                                                                                                                                                                                                                                                                   | 12  | 127049 | 127060 | ycf1 CDS                | SSC |
| p2 | (TA)5                                                                                                                                                                                                                                                                                                                                                   | 10  | 9069   | 9078   | trnS GCU-trnG GCC IGS   | LSC |
| p2 | (TA)5                                                                                                                                                                                                                                                                                                                                                   | 10  | 9489   | 9498   | trnS GCU-trnG GCC IGS   | LSC |
| p2 | (AT)5                                                                                                                                                                                                                                                                                                                                                   | 10  | 20477  | 20486  | rpoC2 CDS               | LSC |
| p2 | (TA)6                                                                                                                                                                                                                                                                                                                                                   | 12  | 30358  | 30369  | petN-psbM IGS           | LSC |
| p2 | (TA)6                                                                                                                                                                                                                                                                                                                                                   | 12  | 32303  | 32314  | trnE UUC-trnT GGU IGS   | LSC |
| p2 | (AT)5                                                                                                                                                                                                                                                                                                                                                   | 10  | 32726  | 32735  | trnE UUC-trnT GGU IGS   | LSC |
| p2 | (AT)6                                                                                                                                                                                                                                                                                                                                                   | 12  | 60002  | 60013  | psaI-ycf4 IGS           | LSC |
| p2 | (TA)8                                                                                                                                                                                                                                                                                                                                                   | 16  | 72680  | 72695  | clpP intron2            | LSC |
| p2 | (TA)8                                                                                                                                                                                                                                                                                                                                                   | 16  | 83730  | 83745  | rpl16 intron            | LSC |
| p2 | (GA)5                                                                                                                                                                                                                                                                                                                                                   | 10  | 92127  | 92136  | ycf2 CDS                | IRb |
| p2 | (TC)5                                                                                                                                                                                                                                                                                                                                                   | 10  | 148845 | 148854 | ycf2 CDS                | IRa |
| p3 | (TAT)4                                                                                                                                                                                                                                                                                                                                                  | 12  | 64266  | 64277  | petA-psbJ IGS           | LSC |
| p3 | (ATA)4                                                                                                                                                                                                                                                                                                                                                  | 12  | 115846 | 115857 | trnL UAG-ccsA IGS       | SSC |
| p4 | (TCTA)3                                                                                                                                                                                                                                                                                                                                                 | 12  | 10717  | 10728  | trnR UCU-atpA IGS       | LSC |
| p4 | (GTCT)3                                                                                                                                                                                                                                                                                                                                                 | 12  | 11853  | 11864  | atpA CDS                | LSC |
| p4 | (AATG)3                                                                                                                                                                                                                                                                                                                                                 | 12  | 62173  | 62184  | cemA, cemA-petA CDS-IGS | LSC |
| c  | (T)18attctttg(ATA)4<br>(TA)5tggcaagaatttttggtaac<br>gaaaaaacgaatcttttatatgatt<br>atgataatgatattatacgagaaagg<br>aattcatgaaaacaaat(A)14ttatt<br>attttagagcgtcatatcaaaataatg<br>tatagtgtgtgctgtaaaataggtgatt<br>tatttcctt(A)10<br>(T)10gtaggtcgatccggtggaca<br>tagatccaatttttaaatttttgatcct<br>ttagaa(T)10ccattcctggtggtat<br>caaaataccgccgtgcctagatatttta | 38  | 3627   | 3664   | trnE UUC intron         | LSC |
| c  | aattcatgaaaacaaat(A)14ttatt<br>attttagagcgtcatatcaaaataatg<br>tatagtgtgtgctgtaaaataggtgatt<br>tatttcctt(A)10                                                                                                                                                                                                                                            | 197 | 8196   | 8392   | psbK-psbI IGS           | LSC |
| c  | (T)10gtaggtcgatccggtggaca<br>tagatccaatttttaaatttttgatcct<br>ttagaa(T)10ccattcctggtggtat<br>caaaataccgccgtgcctagatatttta                                                                                                                                                                                                                                | 184 | 18916  | 19099  | rpoC2 CDS               | LSC |



|    |                                                                                                                                                |     |        |        |                    |     |
|----|------------------------------------------------------------------------------------------------------------------------------------------------|-----|--------|--------|--------------------|-----|
| c  | tccatctccccaggaaaatgaatatctc<br>cagaaaaaatfttcagttccatac(T)11<br>(T)10atctttttatattctattatattctat<br>atcatattc(ATT)5                           | 61  | 54627  | 54687  | atpB-rbcL IGS      | LSC |
| c  | (T)10atctttttatattctattatattctat<br>atcatattc(ATT)5                                                                                            | 61  | 54872  | 54932  | atpB-rbcL IGS      | LSC |
| c  | (T)10atagctttctatttatgaaaattta<br>tattgatttatattgaattcgtgagatgattt<br>ttctttactggattcaaagtactaagtatt<br>gtgtatttta(T)10                        | 119 | 115129 | 115247 | ndhF-rpl32 IGS     | SSC |
| c  | (A)10(TA)5                                                                                                                                     | 20  | 115428 | 115447 | rpl32 CDS          | SSC |
| c  | (T)14ctagagtaataaaaagctagatttc<br>taagtatggaaaag(T)10aaactgaac<br>ttatgaagataacttaataaa(TAT)4                                                  | 103 | 115559 | 115661 | rpl32-trnL UAG IGS | SSC |
| c  | (T)11acctttcta(T)11gagttctttata<br>aataggttt(A)10ggtcgttttggagag<br>aaccgaaggttaagtttggttccgttcccc<br>agactgttaaaaaacaaaaatttggtttttc<br>(T)11 | 151 | 125377 | 125527 | ycf1 CDS           | SSC |
| c* | (A)11(AAT)4*aaaggaaaaattc<br>aaataaaaacgaggagaaggaatagga<br>agtctattttgtaaaaggataagtacaat<br>gggattcaagatc(A)11(AAT)4*                         | 126 | 28479  | 28604  | rpoB-trnC GCA IGS  | LSC |

---

Table S5 Percentages of variable characters in coding and noncoding regions within 20 Orchidaceae species.

Table S5a Percentages of variable sites in the introns and spacers (IGS) region.

| Fragments                   | Length (bp) | Aligned length (bp) | Variable positions | Nucleotide substitutions | Number of indels | Total length of indels | Percent variability (%) |
|-----------------------------|-------------|---------------------|--------------------|--------------------------|------------------|------------------------|-------------------------|
| <i>psbA-trnK(UUU)</i>       | 317         | 317                 | 212                | 59                       | 10               | 153                    | 39.66%                  |
| <i>trnK(UUU)-matK</i>       | 422-434     | 434                 | 331                | 43                       | 10               | 288                    | 33.97%                  |
| <i>matK-trnK(UUU)</i>       | 1679-1723   | 1729                | 1327               | 250                      | 42               | 1077                   | 42.07%                  |
| <i>trnK(UUU)-rps16</i>      | 664-1089    | 1089                | 973                | 166                      | 37               | 807                    | 63.64%                  |
| <i>rps16 intron</i>         | 1576-1892   | 2246                | 1620               | 309                      | 51               | 1311                   | 36.51%                  |
| <i>rps16-trnQ(UUG)</i>      | 1394-1395   | 1395                | 1340               | 70                       | 12               | 1270                   | 59.85%                  |
| <i>trnQ(UUG)-psbK</i>       | 482         | 482                 | 342                | 124                      | 26               | 218                    | 51.72%                  |
| <i>psbK-psbI</i>            | 736-791     | 791                 | 692                | 118                      | 28               | 574                    | 59.59%                  |
| <i>trnS(GCU)-trnG(UCC)</i>  | 1641        | 1641                | 1599               | 80                       | 17               | 1519                   | 69.78%                  |
| <i>trnG(UCC) intron</i>     | 794-824     | 824                 | 369                | 161                      | 33               | 208                    | 29.89%                  |
| <i>trnR(UCU)-atpA</i>       | 191-362     | 362                 | 339                | 32                       | 12               | 307                    | 65.67%                  |
| <i>atpF intron</i>          | 1218-1293   | 1293                | 840                | 165                      | 37               | 675                    | 30.84%                  |
| <i>atpF-atpH</i>            | 623         | 623                 | 576                | 39                       | 10               | 537                    | 51.04%                  |
| <i>atpH-atpI</i>            | 1127-1145   | 1145                | 1054               | 127                      | 25               | 927                    | 62.55%                  |
| <i>atpI-rps2</i>            | 542-628     | 628                 | 541                | 64                       | 14               | 477                    | 47.27%                  |
| <i>rps2-rpoC2</i>           | 280-307     | 307                 | 210                | 49                       | 12               | 161                    | 38.61%                  |
| <i>rpoC2-rpoC1</i>          | 242-254     | 254                 | 153                | 58                       | 9                | 95                     | 39.88%                  |
| <i>rpoC1 intron</i>         | 853-887     | 890                 | 482                | 169                      | 28               | 313                    | 32.56%                  |
| <i>rpoB-trnC(GCA)</i>       | 2011-2098   | 2098                | 1847               | 213                      | 46               | 1634                   | 50.78%                  |
| <i>trnC(GCA)-petN</i>       | 1115-1138   | 1138                | 1095               | 107                      | 20               | 988                    | 74.71%                  |
| <i>petN-psbM</i>            | 974-1202    | 1202                | 1138               | 156                      | 34               | 982                    | 74.80%                  |
| <i>psbM-trnD(GUC)</i>       | 1565        | 1565                | 1488               | 163                      | 20               | 1325                   | 70.38%                  |
| <i>trnD(GUC)-trnY(GUA)</i>  | 407         | 407                 | 345                | 62                       | 14               | 283                    | 55.07%                  |
| <i>trnE(UUC)-trnT(GGU)</i>  | 2034        | 2034                | 1990               | 29                       | 11               | 1961                   | 47.62%                  |
| <i>trnT(GGU)-psbD</i>       | 1625-1626   | 1626                | 1466               | 112                      | 21               | 1354                   | 45.39%                  |
| <i>psbC-trnS(UGA)</i>       | 236-237     | 237                 | 185                | 52                       | 13               | 133                    | 55.56%                  |
| <i>trnS(UGA)-psbZ</i>       | 351-352     | 352                 | 229                | 79                       | 12               | 150                    | 42.52%                  |
| <i>psbZ-trnG(UCC)</i>       | 468         | 468                 | 345                | 110                      | 18               | 235                    | 51.00%                  |
| <i>trnG(UCC)-trnfm(CAU)</i> | 321-322     | 322                 | 308                | 7                        | 5                | 301                    | 46.15%                  |
| <i>psaA-ycf3</i>            | 856-1088    | 1088                | 859                | 241                      | 32               | 618                    | 54.38%                  |
| <i>ycf3 intron1</i>         | 1228        | 1228                | 766                | 181                      | 34               | 585                    | 31.76%                  |
| <i>ycf3 intron2</i>         | 843-845     | 845                 | 327                | 157                      | 25               | 170                    | 26.00%                  |
| <i>ycf3-trnS(GGA)</i>       | 716         | 716                 | 614                | 37                       | 31               | 577                    | 40.00%                  |
| <i>trnS(GGA)-rps4</i>       | 429-430     | 430                 | 326                | 64                       | 16               | 262                    | 43.48%                  |
| <i>rps4-trnT(UGU)</i>       | 595         | 595                 | 478                | 69                       | 20               | 409                    | 43.20%                  |
| <i>trnT(UGU)-trnL(UAA)</i>  | 1516        | 1516                | 1408               | 181                      | 37               | 1227                   | 66.87%                  |
| <i>trnL(UAA) intron</i>     | 1147-1148   | 1148                | 882                | 130                      | 28               | 752                    | 37.26%                  |
| <i>trnL(UAA)-trnF(GAA)</i>  | 618         | 618                 | 567                | 71                       | 16               | 496                    | 63.04%                  |
| <i>trnF(GAA)-ndhJ</i>       | 1037        | 1037                | 1020               | 25                       | 4                | 995                    | 63.04%                  |
| <i>ndhC-trnV(UAC)</i>       | 1744        | 1744                | 1694               | 58                       | 15               | 1636                   | 59.35%                  |
| <i>trnV(UAC) intron</i>     | 738-750     | 750                 | 342                | 146                      | 22               | 196                    | 29.17%                  |
| <i>trnV(UAC)-trnM(CAU)</i>  | 260-263     | 265                 | 156                | 56                       | 13               | 100                    | 38.76%                  |
| <i>trnM(CAU)-atpE</i>       | 238-241     | 241                 | 171                | 70                       | 13               | 101                    | 54.25%                  |

|                            |           |      |      |     |    |      |         |
|----------------------------|-----------|------|------|-----|----|------|---------|
| <i>atpB-rbcL</i>           | 1436-1439 | 1439 | 1164 | 289 | 58 | 875  | 55.79%  |
| <i>rbcL-accD</i>           | 1163-1714 | 1714 | 1467 | 262 | 48 | 1205 | 55.66%  |
| <i>accD-psaI</i>           | 604-1110  | 1119 | 1029 | 112 | 23 | 917  | 60.00%  |
| <i>psaI-ycf4</i>           | 528-720   | 720  | 403  | 168 | 28 | 235  | 38.21%  |
| <i>ycf4-cemA</i>           | 1080-1520 | 1520 | 1213 | 180 | 22 | 1033 | 39.69%  |
| <i>cemA-petA</i>           | 348-484   | 484  | 266  | 104 | 20 | 162  | 36.26%  |
| <i>petA-psbJ</i>           | 1442-1452 | 1452 | 1332 | 88  | 15 | 1244 | 46.19%  |
| <i>psbE-petL</i>           | 1754      | 1754 | 1547 | 185 | 31 | 1362 | 51.06%  |
| <i>petL-petG</i>           | 226       | 226  | 132  | 49  | 10 | 83   | 38.56%  |
| <i>trmW(CCA)-trnP(UGG)</i> | 247       | 247  | 208  | 51  | 10 | 157  | 61.00%  |
| <i>trnP(UGG)-psaJ</i>      | 552-553   | 553  | 460  | 67  | 16 | 393  | 47.16%  |
| <i>psaJ-rpl33</i>          | 750-818   | 818  | 712  | 78  | 17 | 634  | 47.26%  |
| <i>rpl33-rps18</i>         | 259       | 259  | 201  | 51  | 13 | 201  | 90.14%  |
| <i>rps18-rpl20</i>         | 240-394   | 394  | 321  | 54  | 12 | 267  | 47.48%  |
| <i>rpl20-rps12</i>         | 1094-1124 | 1124 | 696  | 147 | 26 | 549  | 28.79%  |
| <i>clpP intron1</i>        | 828       | 829  | 477  | 150 | 38 | 327  | 34.81%  |
| <i>clpP intron2</i>        | 1466-1472 | 1473 | 1048 | 223 | 43 | 825  | 38.49%  |
| <i>clpP-psbB</i>           | 1186      | 1186 | 990  | 136 | 25 | 854  | 45.10%  |
| <i>psbB-psbT</i>           | 768-777   | 777  | 726  | 29  | 4  | 697  | 39.29%  |
| <i>psbH-petB</i>           | 219-806   | 806  | 454  | 171 | 28 | 283  | 36.12%  |
| <i>petB intron</i>         | 248-854   | 854  | 400  | 200 | 34 | 200  | 34.01%  |
| <i>petB-petD</i>           | 260-267   | 267  | 179  | 60  | 15 | 119  | 46.01%  |
| <i>petD intron</i>         | 1083-1085 | 1085 | 648  | 256 | 45 | 392  | 40.79%  |
| <i>petD-rpoA</i>           | 16-278    | 278  | 196  | 54  | 12 | 142  | 44.59%  |
| <i>rpoA-rps11</i>          | 223       | 223  | 178  | 30  | 8  | 148  | 45.78%  |
| <i>rps11-rpl36</i>         | 250       | 250  | 212  | 60  | 15 | 152  | 66.37%  |
| <i>rpl36-infA</i>          | 219-226   | 226  | 170  | 44  | 7  | 126  | 47.66%  |
| <i>rps8-rpl14</i>          | 494-927   | 927  | 855  | 68  | 12 | 787  | 52.63%  |
| <i>rpl16 intron</i>        | 1930-1933 | 1933 | 1486 | 276 | 49 | 1210 | 42.10%  |
| <i>rpl16-rps3</i>          | 220-229   | 229  | 159  | 78  | 14 | 81   | 56.79%  |
| <i>rpl22-rps19</i>         | 349-352   | 352  | 305  | 11  | 6  | 294  | 26.56%  |
| <i>rpl2 intron</i>         | 711-715   | 715  | 95   | 39  | 6  | 56   | 6.77%   |
| <i>rpl2-rpl23</i>          | 4-403     | 484  | 326  | 22  | 3  | 304  | 13.66%  |
| <i>ycf2-trnI(CAA)</i>      | 943-1403  | 1403 | 830  | 120 | 25 | 710  | 20.19%  |
| <i>trnI(CAU)-ndhB</i>      | 649-656   | 656  | 581  | 43  | 5  | 538  | 39.02%  |
| <i>ndhB intron</i>         | 720       | 720  | 720  | 0   | 1  | 720  | 100.00% |
| <i>ndhB-rps7</i>           | 380       | 380  | 149  | 35  | 9  | 114  | 16.00%  |
| <i>rps12 intron</i>        | 472-565   | 573  | 63   | 43  | 4  | 20   | 8.44%   |
| <i>rps12-trnV(GAC)</i>     | 2390-2393 | 2393 | 2113 | 53  | 14 | 2060 | 19.31%  |
| <i>trnV(GAC)-rrn16</i>     | 283       | 283  | 122  | 47  | 8  | 75   | 25.46%  |
| <i>rrn16-trnI(GAU)</i>     | 332-346   | 346  | 111  | 29  | 8  | 82   | 13.60%  |
| <i>trnI(GAU) intron</i>    | 1076-1086 | 1086 | 330  | 96  | 18 | 234  | 13.10%  |
| <i>trnA(UGC) intron</i>    | 856       | 856  | 136  | 54  | 15 | 82   | 8.75%   |
| <i>rrn4.5-rrn5</i>         | 243       | 243  | 158  | 70  | 14 | 88   | 49.70%  |
| <i>rrn5-trnR(ACG)</i>      | 301       | 301  | 277  | 7   | 2  | 277  | 34.62%  |
| <i>trnR(ACG)-trnN(GUU)</i> | 880       | 880  | 777  | 45  | 12 | 732  | 35.63%  |
| <i>trnN(GUU)-ycf1</i>      | 534       | 534  | 412  | 86  | 15 | 326  | 45.29%  |
| <i>ndhF-rpl32</i>          | 1676-1687 | 1687 | 1673 | 48  | 11 | 1625 | 80.82%  |
| <i>rpl32-trnL(UAG)</i>     | 1472-1487 | 1487 | 1416 | 215 | 48 | 1201 | 78.74%  |

|                |          |      |      |     |    |      |         |
|----------------|----------|------|------|-----|----|------|---------|
| trnL(UAG)-ccsA | 336-743  | 744  | 442  | 164 | 12 | 278  | 36.82%  |
| ccsA-ndhD      | 295-439  | 474  | 474  | 0   | 1  | 474  | 100.00% |
| psaC-ndhE      | 1074     | 1074 | 979  | 84  | 22 | 895  | 52.74%  |
| ndhE-ndhG      | 274-289  | 289  | 274  | 57  | 9  | 217  | 81.48%  |
| ndhH-rps15     | 236-274  | 274  | 258  | 54  | 5  | 204  | 78.67%  |
| rps15-ycf1     | 442-3024 | 3024 | 2206 | 778 | 59 | 1428 | 50.57%  |

Table S5b Percentages of variable sites in the protein coding sequences (CDS) region.

| Fragments    | Length (bp) | Aligned length (bp) | Variable positions | Nucleotide substitutions | Number of indels | Total length of indels | Percent variability (%) |
|--------------|-------------|---------------------|--------------------|--------------------------|------------------|------------------------|-------------------------|
| <i>psbA</i>  | 2259        | 2259                | 245                | 239                      | 1                | 6                      | 10.65%                  |
| <i>matK</i>  | 1377-1611   | 1611                | 605                | 525                      | 18               | 80                     | 35.05%                  |
| <i>rps16</i> | 240-351     | 357                 | 253                | 157                      | 11               | 96                     | 61.76%                  |
| <i>psbK</i>  | 186         | 186                 | 48                 | 48                       | 0                | 0                      | 25.81%                  |
| <i>psbI</i>  | 111-156     | 156                 | 59                 | 59                       | 0                | 0                      | 37.82%                  |
| <i>atpA</i>  | 1524-1563   | 1563                | 306                | 303                      | 3                | 3                      | 19.58%                  |
| <i>atpF</i>  | 567-633     | 633                 | 239                | 158                      | 6                | 81                     | 29.39%                  |
| <i>atpH</i>  | 252         | 252                 | 40                 | 34                       | 1                | 6                      | 14.17%                  |
| <i>atpI</i>  | 744-762     | 762                 | 141                | 137                      | 2                | 4                      | 18.29%                  |
| <i>rps2</i>  | 714         | 714                 | 189                | 171                      | 1                | 18                     | 24.68%                  |
| <i>rpoC2</i> | 4275-4285   | 4287                | 1161               | 964                      | 30               | 197                    | 24.13%                  |
| <i>rpoC1</i> | 2055-2091   | 2091                | 411                | 336                      | 7                | 75                     | 16.96%                  |
| <i>rpoB</i>  | 3222-3285   | 3285                | 621                | 606                      | 8                | 15                     | 18.73%                  |
| <i>psbD</i>  | 853-1083    | 1083                | 129                | 107                      | 2                | 22                     | 10.25%                  |
| <i>psbC</i>  | 1224-1422   | 1422                | 167                | 164                      | 3                | 3                      | 11.74%                  |
| <i>psbZ</i>  | 189         | 189                 | 23                 | 23                       | 0                | 0                      | 12.17%                  |
| <i>rps14</i> | 369         | 369                 | 71                 | 71                       | 0                | 0                      | 19.24%                  |
| <i>psaB</i>  | 2217        | 2217                | 278                | 265                      | 2                | 13                     | 12.10%                  |
| <i>psaA</i>  | 2259        | 2259                | 245                | 239                      | 1                | 6                      | 10.65%                  |
| <i>ycf3</i>  | 504-621     | 621                 | 187                | 187                      | 0                | 0                      | 30.11%                  |
| <i>rps4</i>  | 606         | 606                 | 112                | 112                      | 0                | 0                      | 18.48%                  |
| <i>ndhJ</i>  | 477-486     | 486                 | 55                 | 55                       | 0                | 0                      | 11.32%                  |
| <i>ndhK</i>  | 583-915     | 915                 | 743                | 189                      | 13               | 554                    | 54.01%                  |
| <i>ndhC</i>  | 240-363     | 363                 | 284                | 116                      | 5                | 168                    | 60.50%                  |
| <i>atpE</i>  | 405         | 405                 | 84                 | 81                       | 3                | 3                      | 20.74%                  |
| <i>atpB</i>  | 1509-1536   | 1536                | 268                | 235                      | 3                | 33                     | 15.80%                  |
| <i>rbcL</i>  | 1452-1488   | 1488                | 243                | 226                      | 2                | 17                     | 15.48%                  |
| <i>accD</i>  | 3234-3264   | 3264                | 2399               | 548                      | 55               | 1851                   | 41.08%                  |
| <i>ycf4</i>  | 282-567     | 567                 | 133                | 118                      | 4                | 15                     | 21.94%                  |
| <i>cemA</i>  | 216-690     | 690                 | 226                | 167                      | 7                | 59                     | 27.27%                  |
| <i>petA</i>  | 978         | 978                 | 162                | 144                      | 5                | 18                     | 15.44%                  |
| <i>psbE</i>  | 252         | 252                 | 28                 | 28                       | 0                | 0                      | 11.11%                  |
| <i>psaJ</i>  | 129-159     | 159                 | 32                 | 31                       | 1                | 1                      | 20.13%                  |
| <i>rpl33</i> | 225         | 225                 | 68                 | 44                       | 1                | 24                     | 22.28%                  |
| <i>rps18</i> | 444         | 444                 | 218                | 80                       | 6                | 138                    | 27.56%                  |
| <i>rpl20</i> | 354-420     | 420                 | 144                | 137                      | 2                | 7                      | 33.49%                  |
| <i>rps12</i> | 379-393     | 393                 | 266                | 52                       | 5                | 214                    | 30.98%                  |
| <i>clpP</i>  | 594-675     | 675                 | 256                | 236                      | 4                | 20                     | 36.42%                  |

|              |           |      |      |      |     |      |        |
|--------------|-----------|------|------|------|-----|------|--------|
| <i>psbB</i>  | 1471-1527 | 1527 | 241  | 238  | 3   | 3    | 15.78% |
| <i>petB</i>  | 459-700   | 726  | 161  | 157  | 2   | 4    | 21.96% |
| <i>petD</i>  | 483-669   | 711  | 235  | 229  | 1   | 6    | 32.58% |
| <i>rpoA</i>  | 1020      | 1020 | 282  | 225  | 7   | 57   | 23.92% |
| <i>rps11</i> | 435       | 435  | 127  | 107  | 4   | 20   | 26.49% |
| <i>infA</i>  | 246-255   | 255  | 76   | 55   | 2   | 21   | 24.15% |
| <i>rps8</i>  | 396       | 396  | 87   | 86   | 1   | 1    | 21.97% |
| <i>rpl14</i> | 369       | 369  | 71   | 71   | 0   | 0    | 19.24% |
| <i>rpl16</i> | 360-435   | 435  | 128  | 113  | 4   | 15   | 27.59% |
| <i>rps3</i>  | 672-678   | 678  | 199  | 171  | 5   | 28   | 26.87% |
| <i>rpl22</i> | 372-552   | 552  | 276  | 241  | 5   | 35   | 47.13% |
| <i>rps19</i> | 210-279   | 279  | 40   | 40   | 0   | 0    | 14.34% |
| <i>rpl2</i>  | 738-825   | 825  | 66   | 63   | 1   | 3    | 7.78%  |
| <i>rpl23</i> | 292-303   | 303  | 52   | 30   | 2   | 22   | 11.31% |
| <i>ycf2</i>  | 6037-7587 | 7587 | 3105 | 885  | 67  | 2220 | 17.52% |
| <i>ndhB</i>  | 1542      | 1542 | 112  | 83   | 5   | 29   | 5.80%  |
| <i>rps7</i>  | 474       | 474  | 45   | 39   | 1   | 6    | 8.53%  |
| <i>ndhF</i>  | 138-2268  | 2268 | 1664 | 639  | 27  | 1025 | 52.44% |
| <i>rpl32</i> | 152-174   | 174  | 120  | 70   | 6   | 50   | 58.46% |
| <i>ccsA</i>  | 607-1014  | 1014 | 375  | 261  | 14  | 114  | 30.09% |
| <i>ndhD</i>  | 963-1560  | 1560 | 665  | 190  | 6   | 475  | 17.97% |
| <i>psaC</i>  | 246       | 246  | 31   | 31   | 0   | 0    | 12.60% |
| <i>ndhE</i>  | 306-321   | 321  | 70   | 70   | 0   | 0    | 21.81% |
| <i>ndhG</i>  | 258-531   | 531  | 66   | 66   | 0   | 0    | 12.43% |
| <i>ndhI</i>  | 510-546   | 561  | 424  | 175  | 7   | 249  | 57.05% |
| <i>ndhA</i>  | 1107      | 1107 | 661  | 105  | 4   | 556  | 19.64% |
| <i>ndhH</i>  | 1182      | 1182 | 116  | 116  | 0   | 0    | 9.81%  |
| <i>rps15</i> | 240-276   | 276  | 99   | 86   | 3   | 13   | 33.46% |
| <i>ycf1</i>  | 4929-6582 | 6582 | 5030 | 1299 | 117 | 3731 | 47.71% |



|             |        |              |    |                                     |                           |            |            |
|-------------|--------|--------------|----|-------------------------------------|---------------------------|------------|------------|
|             | model8 | -1941.208783 | 42 | p0 =0.87164 p =1.11301 q =3.89127   | (p1 =0.12836) w =1.60799  |            |            |
| <i>atpH</i> | model0 | -542.02404   | 39 | omega (dN/dS) =0.06818              |                           |            |            |
|             | model1 | -542.006769  | 40 | p=0.99358 0.00642                   | w=0.06406 1.00000         |            |            |
|             | model2 | -542.006769  | 42 | p=0.99358 0.00210 0.00432           | w=0.06406 1.00000 1.00000 |            |            |
|             | model3 | -541.867784  | 43 | p=0.43689 0.20553 0.35758           | w=0.00000 0.12140 0.12140 |            |            |
|             | model7 | -541.875402  | 40 | p =0.85973 q =11.32282              |                           |            |            |
|             | model8 | -541.875499  | 42 | p0 =0.99999 p =0.86009 q =11.32854  | (p1 =0.00001) w =1.00000  |            |            |
| <i>atpI</i> | model0 | -2043.804493 | 39 | omega (dN/dS) =0.15030              |                           |            |            |
|             | model1 | -2022.584987 | 40 | p=0.87209 0.12791                   | w=0.04412 1.00000         |            |            |
|             | model2 | -2022.219882 | 42 | p=0.88401 0.09904 0.01695           | w=0.04978 1.00000 2.43569 |            |            |
|             | model3 | -2021.970185 | 43 | p=0.62352 0.32701 0.04947           | w=0.00000 0.27198 1.92187 |            |            |
|             | model7 | -2023.321405 | 40 | p =0.09837 q =0.50540               |                           |            |            |
|             | model8 | -2021.985587 | 42 | p0 =0.95705 p =0.22592 q =1.90193   | (p1 =0.04295) w =2.01657  |            |            |
| <i>ccsA</i> | model0 | -1118.278228 | 39 | omega (dN/dS) =0.81855              |                           |            |            |
|             | model1 | -1105.658405 | 40 | p=0.52745 0.47255                   | w=0.10558 1.00000         |            |            |
|             | model2 | -1096.541843 | 42 | p=0.64140 0.20081 0.15779           | w=0.25967 1.00000 3.83925 |            |            |
|             | model3 | -1096.53864  | 43 | p=0.68737 0.16492 0.14770           | p=0.68737 0.16492 0.14770 |            |            |
|             | model7 | -1106.758699 | 40 | p =0.12010 q =0.09121               |                           |            |            |
|             | model8 | -1096.549564 | 42 | p0 =0.82609 p =1.41334 q =2.11415   | (p1 =0.17391) w =3.68361  | 43I0.995** | 70A0.996** |
| <i>cemA</i> | model0 | -591.29386   | 39 | omega (dN/dS) =0.34563              |                           |            |            |
|             | model1 | -588.007972  | 40 | p=0.76281 0.23719                   | p=0.76281 0.23719         |            |            |
|             | model2 | -587.633254  | 42 | p=0.84091 0.00000 0.15909           | w=0.22296 1.00000 1.59616 |            |            |
|             | model3 | -587.633254  | 43 | p=0.26097 0.57994 0.15909           | w=0.22296 0.22296 1.59616 |            |            |
|             | model7 | -588.928797  | 40 | p =0.68781 q =1.12286               |                           |            |            |
|             | model8 | -587.654195  | 42 | p0 =0.84292 p =28.88357 q =99.00000 | (p1 =0.15708) w =1.60416  |            |            |
| <i>clpP</i> | model0 | -1947.160568 | 39 | omega (dN/dS) =0.39134              |                           |            |            |
|             | model1 | -1935.069689 | 40 | p=0.61510 0.38490                   | w=0.13197 1.00000         |            |            |
|             | model2 | -1935.069689 | 42 | p=0.61510 0.26952 0.11539           | w=0.13197 1.00000 1.00000 |            |            |
|             | model3 | -1933.282794 | 43 | p=0.32013 0.64934 0.03054           | w=0.00000 0.57211 2.95424 |            |            |
|             | model7 | -1934.73402  | 40 | p =0.34032 q =0.43015               |                           |            |            |
|             | model8 | -1933.741944 | 42 | p0 =0.98289 p =0.44013 q =0.61467   | (p1 =0.01711) w =3.54442  |            |            |
| <i>infA</i> | model0 | -660.388734  | 39 | omega (dN/dS) =0.11934              |                           |            |            |
|             | model1 | -660.024396  | 40 | p=0.95822 0.04178                   | w=0.10112 1.00000         |            |            |

|             |        |              |    |                                    |                             |           |
|-------------|--------|--------------|----|------------------------------------|-----------------------------|-----------|
|             | model2 | -660.024396  | 42 | p=0.95822 0.02137 0.02041          | w=0.10112 1.00000 1.00000   |           |
|             | model3 | -659.777366  | 43 | p=0.23596 0.25996 0.50408          | w=0.02433 0.02433 0.22977   |           |
|             | model7 | -659.783332  | 40 | p =0.87556 q =5.75383              |                             |           |
|             | model8 | -659.783387  | 42 | p0 =0.99999 p =0.87567 q =5.75488  | (p1 =0.00001) w =1.00000    |           |
| <i>matK</i> | model0 | -5715.255186 | 39 | omega (dN/dS) =0.44157             |                             |           |
|             | model1 | -5650.370591 | 40 | p=0.66246 0.33754                  | w=0.16225 1.00000           |           |
|             | model2 | -5644.060931 | 42 | p=0.66531 0.29526 0.03943          | w=0.18473 1.00000 2.84240   |           |
|             | model3 | -5641.74757  | 43 | p=0.40886 0.51793 0.07321          | w=0.08281 0.57798 2.35733   |           |
|             | model7 | -5654.260871 | 40 | p =0.43664 q =0.57283              |                             |           |
|             | model8 | -5641.988921 | 42 | p0 =0.93554 p =0.73363 q =1.22112  | (p1 =0.06446) w =2.43593    |           |
| <i>petA</i> | model0 | -2609.741206 | 39 | omega (dN/dS) =0.16156             |                             |           |
|             | model1 | -2575.421129 | 40 | p=0.87182 0.12818                  | w=0.04623 1.00000           |           |
|             | model2 | -2573.940165 | 42 | p=0.88598 0.09457 0.01945          | w=0.05444 1.00000 2.96782   |           |
|             | model3 | -2572.933212 | 43 | p=0.62521 0.33659 0.03820          | w=0.00000 0.30240 2.51099   |           |
|             | model7 | -2576.796892 | 40 | p =0.09702 q =0.48253              |                             |           |
|             | model8 | -2573.121887 | 42 | p0 =0.96389 p =0.24226 q =1.87986  | (p1 =0.03611) w =2.53368    |           |
| <i>petB</i> | model0 | -1080.581644 | 39 | omega (dN/dS) =0.08863             |                             |           |
|             | model1 | -1067.561634 | 40 | p=0.90048 0.09952                  | w=0.00716 1.00000           |           |
|             | model2 | -1067.561636 | 42 | p=0.90048 0.04215 0.05736          | w=0.00716 1.00000 1.00000   |           |
|             | model3 | -1067.492398 | 43 | p=0.87308 0.11211 0.01481          | w=0.00000 0.71134 1.44179   |           |
|             | model7 | -1067.522296 | 40 | p =0.02716 q =0.25678              |                             |           |
|             | model8 | -1067.492826 | 42 | p0 =0.96957 p =0.01283 q =0.20694  | (p1 =0.03043) w =1.19628    |           |
| <i>petD</i> | model0 | -1330.950652 | 39 | omega (dN/dS) =0.08795             |                             |           |
|             | model1 | -1286.808743 | 40 | p=0.93602 0.06398                  | w=0.00169 1.00000           |           |
|             | model2 | -1284.924274 | 42 | p=0.94033 0.03636 0.02331          | w=0.00245 1.00000 2.55005   |           |
|             | model3 | -1285.172258 | 43 | p=0.15820 0.78665 0.05515          | w=0.00319 0.00332 1.65639   |           |
|             | model7 | -1287.764137 | 40 | p =0.00500 q =0.03478              |                             |           |
|             | model8 | -1285.172989 | 42 | p0 =0.94498 p =0.34712 q =93.92009 | (p1 =0.05502) w =1.65918    | 2G0.991** |
| <i>petG</i> | model0 | -305.266194  | 39 | omega (dN/dS) =0.08873             |                             |           |
|             | model1 | -299.472955  | 40 | p=0.92418 0.07582                  | w=0.01304 1.00000           |           |
|             | model2 | -266.875911  | 42 | p=0.81068 0.15996 0.02936          | w=0.00000 1.00000 94.34796  |           |
|             | model3 | -265.49392   | 43 | p=0.90875 0.06315 0.02809          | w=0.04458 4.11622 117.37218 |           |
|             | model7 | -299.596622  | 40 | p =0.00500 q =0.03082              |                             |           |



|             |        |              |    |                                     |                            |            |
|-------------|--------|--------------|----|-------------------------------------|----------------------------|------------|
|             | model8 | -267.08922   | 42 | p0 =0.96849 p =0.01116 q =0.07239   | (p1 =0.03151) w =83.05482  |            |
| <i>petL</i> | model0 | -242.629156  | 39 | omega (dN/dS) =1.96980              |                            |            |
|             | model1 | -243.012755  | 40 | p=0.99999 0.00001                   | w=1.00000 1.00000          |            |
|             | model2 | -242.37431   | 42 | p=0.80360 0.08016 0.11624           | w=1.00000 1.00000 3.78355  |            |
|             | model3 | -241.539084  | 43 | p=0.11603 0.81411 0.06986           | w=0.08045 2.12488 6.98690  |            |
|             | model7 | -242.786121  | 40 | p =33.01305 q =0.00500              |                            |            |
|             | model8 | -241.411408  | 42 | p0 =0.14093 p =11.16185 q =99.00000 | (p1 =0.85907) w =2.55120   | 16S0.992** |
| <i>petN</i> | model0 | -237.275342  | 39 | omega (dN/dS) =0.27583              |                            |            |
|             | model1 | -236.936612  | 40 | p=0.65920 0.34080                   | w=0.19770 1.00000          |            |
|             | model2 | -236.936612  | 42 | p=0.65920 0.24698 0.09382           | w=0.19770 1.00000 1.00000  |            |
|             | model3 | -236.214357  | 43 | p=0.31796 0.60837 0.07367           | w=0.06122 0.41992 0.41992  |            |
|             | model7 | -236.420972  | 40 | p =1.27564 q =2.76467               |                            |            |
|             | model8 | -236.420982  | 42 | p0 =0.99999 p =1.27565 q =2.76472   | (p1 =0.00001) w =1.00000   |            |
| <i>psaA</i> | model0 | -5136.762038 | 39 | omega (dN/dS) =0.05780              |                            |            |
|             | model1 | -5111.716694 | 40 | p=0.96448 0.03552                   | w=0.02466 1.00000          |            |
|             | model2 | -5111.488393 | 42 | p=0.97342 0.00000 0.02658           | w=0.02799 1.00000 1.29777  |            |
|             | model3 | -5111.468399 | 43 | p=0.58007 0.39782 0.02210           | w=0.00000 0.07705 1.40048  |            |
|             | model7 | -5113.821116 | 40 | p =0.04556 q =0.64081               |                            |            |
|             | model8 | -5111.472168 | 42 | p0 =0.97751 p =0.51170 q =15.11825  | (p1 =0.02249) w =1.38945   |            |
| <i>psaB</i> | model0 | -5170.307983 | 39 | omega (dN/dS) =0.04680              |                            |            |
|             | model1 | -5155.049981 | 40 | p=0.97035 0.02965                   | w=0.02410 1.00000          |            |
|             | model2 | -5155.049983 | 42 | p=0.97035 0.02965 0.00000           | w=0.02410 1.00000 27.56975 |            |
|             | model3 | -5154.11512  | 43 | p=0.82158 0.16466 0.01376           | w=0.00000 0.22239 0.94426  |            |
|             | model7 | -5154.313684 | 40 | p =0.06077 q =1.01864               |                            |            |
|             | model8 | -5154.128829 | 42 | p0 =0.98958 p =0.08166 q =1.68835   | (p1 =0.01042) w =1.00000   |            |
| <i>psaC</i> | model0 | -608.425433  | 39 | omega (dN/dS) =0.00374              |                            |            |
|             | model1 | -608.425799  | 40 | p=0.99999 0.00001                   | w=0.00374 1.00000          |            |
|             | model2 | -586.565724  | 42 | p=0.98779 0.00000 0.01221           | w=0.00552 1.00000 22.99982 |            |
|             | model3 | -608.425433  | 43 | p=0.18748 0.39725 0.41527           | w=0.00368 0.00375 0.00376  |            |
|             | model7 | -608.426036  | 40 | p =0.40565 q =99.00000              |                            |            |
|             | model8 | -586.566036  | 42 | p0 =0.98779 p =0.58577 q =99.00000  | (p1 =0.01221) w =23.00686  |            |
| <i>psal</i> | model0 | -320.129977  | 39 | omega (dN/dS) =0.23679              |                            |            |
|             | model1 | -318.714876  | 40 | p=0.86381 0.13619                   | w=0.15130 1.00000          |            |

|             |        |              |    |                        |             |             |               |            |          |
|-------------|--------|--------------|----|------------------------|-------------|-------------|---------------|------------|----------|
|             | model2 | -318.572337  | 42 | p=0.90505              | 0.00000     | 0.09495     | w=0.16916     | 1.00000    | 1.53648  |
|             | model3 | -318.572337  | 43 | p=0.27551              | 0.62954     | 0.09495     | w=0.16916     | 0.16916    | 1.53648  |
|             | model7 | -319.324893  | 40 | p =0.83859             | q =2.31953  |             |               |            |          |
|             | model8 | -318.5934    | 42 | p0 =0.90700            | p =20.55635 | q =99.00000 | (p1 =0.09300) | w =1.54699 |          |
| <i>psaI</i> | model0 | -359.746551  | 39 | omega (dN/dS) =0.14613 |             |             |               |            |          |
|             | model1 | -358.46201   | 40 | p=0.87158              | 0.12842     |             | w=0.05538     | 1.00000    |          |
|             | model2 | -358.46201   | 42 | p=0.87158              | 0.06648     | 0.06194     | w=0.05538     | 1.00000    | 1.00000  |
|             | model3 | -358.081173  | 43 | p=0.39829              | 0.26038     | 0.34133     | w=0.00000     | 0.00000    | 0.43577  |
|             | model7 | -358.187425  | 40 | p =0.19523             | q =1.06158  |             |               |            |          |
|             | model8 | -358.187431  | 42 | p0 =0.99999            | p =0.19523  | q =1.06166  | (p1 =0.00001) | w =1.00000 |          |
| <i>psbA</i> | model0 | -2511.403818 | 39 | omega (dN/dS) =0.03212 |             |             |               |            |          |
|             | model1 | -2491.668779 | 40 | p=0.97524              | 0.02476     |             | w=0.00968     | 1.00000    |          |
|             | model2 | -2491.668779 | 42 | p=0.97524              | 0.02476     | 0.00000     | w=0.00968     | 1.00000    | 25.04824 |
|             | model3 | -2491.42154  | 43 | p=0.88997              | 0.09907     | 0.01096     | w=0.00000     | 0.17852    | 1.56221  |
|             | model7 | -2494.443024 | 40 | p =0.01122             | q =0.22453  |             |               |            |          |
|             | model8 | -2491.421612 | 42 | p0 =0.98904            | p =0.01573  | q =0.44677  | (p1 =0.01096) | w =1.56208 |          |
| <i>psbB</i> | model0 | -3808.899355 | 39 | -3808.899355           |             |             |               |            |          |
|             | model1 | -3766.3505   | 40 | p=0.95422              | 0.04578     |             | w=0.01989     | 1.00000    |          |
|             | model2 | -3763.846243 | 42 | p=0.95639              | 0.04128     | 0.00232     | w=0.02102     | 1.00000    | 9.02702  |
|             | model3 | -3764.021172 | 43 | p=0.79392              | 0.18908     | 0.01700     | w=0.00000     | 0.19149    | 2.19264  |
|             | model7 | -3769.386058 | 40 | p =0.03979             | q =0.48101  |             |               |            |          |
|             | model8 | -3764.05558  | 42 | p0 =0.98462            | p =0.09903  | q =2.11446  | (p1 =0.01538) | w =2.30566 |          |
| <i>psbC</i> | model0 | -2827.930076 | 39 | omega (dN/dS) =0.02969 |             |             |               |            |          |
|             | model1 | -2820.767621 | 40 | p=0.96855              | 0.03145     |             | w=0.00803     | 1.00000    |          |
|             | model2 | -2820.767621 | 42 | p=0.96855              | 0.03145     | 0.00000     | w=0.00803     | 1.00000    | 11.85812 |
|             | model3 | -2819.766744 | 43 | p=0.40229              | 0.52736     | 0.07035     | w=0.00000     | 0.00000    | 0.47444  |
|             | model7 | -2820.105288 | 40 | p =0.01160             | q =0.24552  |             |               |            |          |
|             | model8 | -2820.105384 | 42 | p0 =0.99999            | p =0.01124  | q =0.23749  | (p1 =0.00001) | w =1.00000 |          |
| <i>psbD</i> | model0 | -1815.134795 | 39 | omega (dN/dS) =0.05078 |             |             |               |            |          |
|             | model1 | -1800.167919 | 40 | p=0.95451              | 0.04549     |             | w=0.00919     | 1.00000    |          |
|             | model2 | -1800.049079 | 42 | p=0.96376              | 0.00000     | 0.03624     | w=0.01205     | 1.00000    | 1.29753  |
|             | model3 | -1800.049079 | 43 | p=0.06195              | 0.90181     | 0.03624     | p=0.06195     | 0.90181    | 0.03624  |
|             | model7 | -1801.114182 | 40 | p =0.01071             | q =0.18463  |             |               |            |          |

|             |        |              |    |                                    |                             |            |
|-------------|--------|--------------|----|------------------------------------|-----------------------------|------------|
|             | model8 | -1800.054499 | 42 | p0 =0.96400 p =1.26244 q =99.00000 | (p1 =0.03600) w =1.30012    |            |
| <i>psbE</i> | model0 | -599.291915  | 39 | omega (dN/dS) =0.04113             |                             |            |
|             | model1 | -598.461381  | 40 | p=0.97567 0.02433                  | w=0.02703 1.00000           |            |
|             | model2 | -571.80637   | 42 | p=0.93462 0.05345 0.01193          | w=0.03632 1.00000 35.32003  |            |
|             | model3 | -598.322901  | 43 | p=0.22818 0.63988 0.13194          | w=0.00906 0.00908 0.28357   |            |
|             | model7 | -598.32458   | 40 | p =0.12084 q =2.25751              |                             |            |
|             | model8 | -571.805219  | 42 | p0 =0.98807 p =0.09215 q =0.94217  | (p1 =0.01193) w =35.16835   |            |
| <i>petF</i> | model0 | -277.358932  | 39 | omega (dN/dS) =0.04208             |                             |            |
|             | model1 | -271.462892  | 40 | p=0.96537 0.03463                  | w=0.00000 1.00000           |            |
|             | model2 | -230.437805  | 42 | p=0.90788 0.06710 0.02502          | w=0.00000 1.00000 832.51000 |            |
|             | model3 | -240.672727  | 43 | p=0.94993 0.00000 0.05007          | w=0.00000 0.00000 234.98351 |            |
|             | model7 | -272.329411  | 40 | p =0.00809 q =0.12289              |                             |            |
|             | model8 | -230.514018  | 42 | p0 =0.97498 p =0.00500 q =0.04833  | (p1 =0.02502) w =866.26030  |            |
| <i>psbH</i> | model0 | -740.932966  | 39 | omega (dN/dS) =0.17586             |                             |            |
|             | model1 | -720.475517  | 40 | p=0.82386 0.17614                  | w=0.03513 1.00000           |            |
|             | model2 | -691.717304  | 42 | p=0.75222 0.20905 0.03873          | w=0.03633 1.00000 18.77007  |            |
|             | model3 | -691.356216  | 43 | p=0.79523 0.16869 0.03607          | w=0.05536 1.43491 21.13097  |            |
|             | model7 | -720.650379  | 40 | p =0.09900 q =0.43890              |                             |            |
|             | model8 | -691.906156  | 42 | p0 =0.96080 p =0.06800 q =0.21099  | (p1 =0.03920) w =18.59309   | 18D0.992** |
| <i>psbI</i> | model0 | -239.43191   | 39 | omega (dN/dS) =0.01840             |                             |            |
|             | model1 | -239.432097  | 40 | p=0.99999 0.00001                  | w=0.01840 1.00000           |            |
|             | model2 | -239.43191   | 42 | p=1.00000 0.00000 0.00000          | w=0.01840 1.00000 56.32581  |            |
|             | model3 | -239.43191   | 43 | p=0.20929 0.38381 0.40690          | w=0.01840 0.01840 0.01840   |            |
|             | model7 | -239.439751  | 40 | p =1.90541 q =99.00000             |                             |            |
|             | model8 | -239.440106  | 42 | p0 =0.99999 p =1.90527 q =99.00000 | (p1 =0.00001) w =70.49267   |            |
| <i>psbJ</i> | model0 | -353.697761  | 39 | omega (dN/dS) =0.06517             |                             |            |
|             | model1 | -351.952162  | 40 | p=0.95851 0.04149                  | w=0.03587 1.00000           |            |
|             | model2 | -328.411838  | 42 | p=0.89100 0.08459 0.02441          | w=0.05871 1.00000 32.07455  |            |
|             | model3 | -351.74862   | 43 | p=0.09916 0.83334 0.06750          | w=0.03033 0.03033 0.58238   |            |
|             | model7 | -351.976214  | 40 | p =0.16949 q =2.13609              |                             |            |
|             | model8 | -328.652343  | 42 | p0 =0.97559 p =0.13983 q =0.81750  | (p1 =0.02441) w =32.22586   |            |
| <i>psbK</i> | model0 | -766.990787  | 39 | omega (dN/dS) =0.26314             |                             |            |
|             | model1 | -760.012062  | 40 | p=0.75557 0.24443                  | w=0.11095 1.00000           |            |

|             |        |             |    |                        |             |             |               |              |           |
|-------------|--------|-------------|----|------------------------|-------------|-------------|---------------|--------------|-----------|
|             | model2 | -744.164799 | 42 | p=0.63605              | 0.34773     | 0.01621     | w=0.12313     | 1.00000      | 15.11618  |
|             | model3 | -759.756546 | 43 | p=0.42866              | 0.25665     | 0.31469     | w=0.08231     | 0.08231      | 0.68368   |
|             | model7 | -760.119435 | 40 | p =0.47063             | q =1.26450  |             |               |              |           |
|             | model8 | -745.437735 | 42 | p0 =0.97218            | p =0.35306  | q =0.43787  | (p1 =0.02782) | w =10.11004  |           |
| <i>psbL</i> | model0 | -288.614063 | 39 | omega (dN/dS) =0.03407 |             |             |               |              |           |
|             | model1 | -286.489312 | 40 | p=0.96392              | 0.03608     |             | p=0.96392     | 0.03608      |           |
|             | model2 | -259.767919 | 42 | p=0.94861              | 0.00000     | 0.05139     | w=0.05010     | 1.00000      | 38.77087  |
|             | model3 | -259.767918 | 43 | p=0.36916              | 0.57945     | 0.05139     | w=0.05010     | 0.05010      | 38.77082  |
|             | model7 | -286.674553 | 40 | p =0.00956             | q =0.18825  |             |               |              |           |
|             | model8 | -259.797649 | 42 | p0 =0.94859            | p =5.25355  | q =99.00000 | (p1 =0.05141) | w =37.24594  |           |
| <i>psbM</i> | model0 | -334.969904 | 39 | omega (dN/dS) =0.12830 |             |             |               |              |           |
|             | model1 | -331.359543 | 40 | p=0.90781              | 0.09219     |             | w=0.05764     | 1.00000      |           |
|             | model2 | -301.85983  | 42 | p=0.72888              | 0.24251     | 0.02861     | w=0.07813     | 1.00000      | 42.15404  |
|             | model3 | -300.854552 | 43 | p=0.88218              | 0.08920     | 0.02861     | w=0.16238     | 3.02099      | 48.78520  |
|             | model7 | -331.845708 | 40 | p =0.19378             | q =1.15562  |             |               |              |           |
|             | model8 | -302.066382 | 42 | p0 =0.97138            | p =0.02157  | q =0.04217  | (p1 =0.02862) | w =43.90437  |           |
| <i>psbN</i> | model0 | -359.736673 | 39 | omega (dN/dS) =0.10192 |             |             |               |              |           |
|             | model1 | -359.435571 | 40 | p=0.96774              | 0.03226     |             | w=0.08030     | 1.00000      |           |
|             | model2 | -313.12015  | 42 | p=0.73752              | 0.23973     | 0.02275     | w=0.17457     | 1.00000      | 209.49256 |
|             | model3 | -312.359168 | 43 | p=0.95638              | 0.02088     | 0.02275     | w=0.29131     | 17.62527     | 234.31587 |
|             | model7 | -359.559478 | 40 | p =0.77078             | q =6.38081  |             |               |              |           |
|             | model8 | -313.147882 | 42 | p0 =0.97725            | p =0.35680  | q =0.57727  | (p1 =0.02275) | w =211.19032 |           |
| <i>psbT</i> | model0 | -284.919434 | 39 | omega (dN/dS) =0.05013 |             |             |               |              |           |
|             | model1 | -284.919585 | 40 | p=0.99999              | 0.00001     |             | w=0.05013     | 1.00000      |           |
|             | model2 | -284.919434 | 42 | p=1.00000              | 0.00000     | 0.00000     | w=0.05013     | 1.00000      | 1.00000   |
|             | model3 | -284.919446 | 43 | p=0.25520              | 0.24043     | 0.50437     | w=0.05013     | 0.05013      | 0.05013   |
|             | model7 | -284.949936 | 40 | p =5.34652             | q =99.00000 |             |               |              |           |
|             | model8 | -284.950262 | 42 | p0 =0.99999            | p =5.34652  | q =99.00000 | (p1 =0.00001) | w =55.66033  |           |
| <i>psbZ</i> | model0 | -475.830764 | 39 | omega (dN/dS) =0.09533 |             |             |               |              |           |
|             | model1 | -475.691511 | 40 | p=0.96726              | 0.03274     |             | w=0.07869     | 1.00000      |           |
|             | model2 | -447.25251  | 42 | p=0.77241              | 0.21168     | 0.01591     | w=0.06036     | 1.00000      | 47.24918  |
|             | model3 | -474.909469 | 43 | p=0.60199              | 0.16757     | 0.23044     | w=0.00000     | 0.26053      | 0.26053   |
|             | model7 | -475.058128 | 40 | p =0.36313             | q =3.02296  |             |               |              |           |

|              |        |              |    |                                     |                            |             |             |             |             |             |
|--------------|--------|--------------|----|-------------------------------------|----------------------------|-------------|-------------|-------------|-------------|-------------|
|              | model8 | -447.137387  | 42 | p0 =0.98409 p =0.17568 q =0.54878   | (p1 =0.01591) w =45.83413  |             |             |             |             |             |
| <i>rbcL</i>  | model0 | -3911.862654 | 39 | omega (dN/dS) =0.12988              |                            |             |             |             |             |             |
|              | model1 | -3817.092508 | 40 | p=0.92902 0.07098                   | w=0.02955 1.00000          |             |             |             |             |             |
|              | model2 | -3796.588213 | 42 | p=0.94363 0.03703 0.01934           | w=0.03999 1.00000 4.92488  | 89P0.992**  | 251M0.997** | 375L0.999** | 461I0.999** |             |
|              | model3 | -3796.373581 | 43 | p=0.92228 0.05702 0.02071           | w=0.03366 0.67761 4.70803  |             |             |             |             |             |
|              | model7 | -3820.894279 | 40 | p =0.01878 q =0.12573               |                            |             |             |             |             |             |
|              | model8 | -3796.826963 | 42 | p0 =0.97832 p =0.13976 q =1.72648   | (p1 =0.02168) w =4.55273   | 89P0.999**  | 225L0.997** | 251M1.000** | 375L1.000** | 449S0.998** |
|              |        |              |    |                                     |                            | 461I1.000** | 470E0.991** |             |             |             |
| <i>rpl2</i>  | model0 | -1326.121554 | 39 | omega (dN/dS) =0.32434              |                            |             |             |             |             |             |
|              | model1 | -1324.343079 | 40 | p=0.66295 0.33705                   | w=0.00000 1.00000          |             |             |             |             |             |
|              | model2 | -1324.323355 | 42 | p=0.68983 0.00000 0.31017           | w=0.00000 1.00000 1.12375  |             |             |             |             |             |
|              | model3 | -1324.323355 | 43 | p=0.68983 0.19515 0.11502           | w=0.00000 1.12376 1.12376  |             |             |             |             |             |
|              | model7 | -1324.378166 | 40 | p =0.01443 q =0.02793               |                            |             |             |             |             |             |
|              | model8 | -1324.323355 | 42 | p0 =0.68983 p =0.00500 q =2.78679   | (p1 =0.31017) w =1.12376   |             |             |             |             |             |
| <i>rpl14</i> | model0 | -1160.017074 | 39 | omega (dN/dS) =0.14354              |                            |             |             |             |             |             |
|              | model1 | -1156.500076 | 40 | p=0.91664 0.08336                   | w=0.09427 1.00000          |             |             |             |             |             |
|              | model2 | -1125.587083 | 42 | p=0.86592 0.12594 0.00814           | w=0.11014 1.00000 29.31055 |             |             |             |             |             |
|              | model3 | -1156.077922 | 43 | p=0.55420 0.27588 0.16992           | w=0.07013 0.07013 0.57093  |             |             |             |             |             |
|              | model7 | -1156.265182 | 40 | p =0.46918 q =2.52882               |                            |             |             |             |             |             |
|              | model8 | -1125.832751 | 42 | p0 =0.99186 p =0.40394 q =1.51157   | (p1 =0.00814) w =28.80370  |             |             |             |             |             |
| <i>rpl16</i> | model0 | -1166.181319 | 39 | omega (dN/dS) =0.22765              |                            |             |             |             |             |             |
|              | model1 | -1152.63794  | 40 | p=0.75481 0.24519                   | w=0.06140 1.00000          |             |             |             |             |             |
|              | model2 | -1152.63794  | 42 | p=0.75481 0.15137 0.09381           | w=0.06140 1.00000 1.00000  |             |             |             |             |             |
|              | model3 | -1150.689    | 43 | p=0.54880 0.43517 0.01602           | w=0.00000 0.49891 2.48991  |             |             |             |             |             |
|              | model7 | -1151.76835  | 40 | p =0.18711 q =0.54406               |                            |             |             |             |             |             |
|              | model8 | -1151.370521 | 42 | p0 =0.98756 p =0.23197 q =0.74708   | (p1 =0.01244) w =2.50822   |             |             |             |             |             |
| <i>rpl20</i> | model0 | -1241.165958 | 39 | omega (dN/dS) =0.31696              |                            |             |             |             |             |             |
|              | model1 | -1223.202311 | 40 | p=0.74624 0.25376                   | w=0.09418 1.00000          |             |             |             |             |             |
|              | model2 | -1222.567262 | 42 | p=0.79281 0.00000 0.20719           | w=0.11762 1.00000 1.36372  |             |             |             |             |             |
|              | model3 | -1222.567262 | 43 | p=0.34385 0.44896 0.20719           | w=0.11762 0.11762 1.36372  |             |             |             |             |             |
|              | model7 | -1225.165144 | 40 | p =0.22964 q =0.47489               |                            |             |             |             |             |             |
|              | model8 | -1222.595899 | 42 | p0 =0.79489 p =13.48409 q =99.00000 | (p1 =0.20511) w =1.37053   |             |             |             |             |             |
| <i>rpl22</i> | model0 | -1287.298274 | 39 | omega (dN/dS) =0.32659              |                            |             |             |             |             |             |

|              |        |              |    |                                   |                            |            |             |
|--------------|--------|--------------|----|-----------------------------------|----------------------------|------------|-------------|
|              | model1 | -1254.076303 | 40 | p=0.69532 0.30468                 | w=0.06071 1.00000          |            |             |
|              | model2 | -1246.80774  | 42 | p=0.67704 0.30263 0.02033         | w=0.06164 1.00000 8.44802  | 47R0.995** |             |
|              | model3 | -1246.115699 | 43 | p=0.55487 0.40461 0.04052         | w=0.02045 0.62303 4.59829  |            |             |
|              | model7 | -1254.310885 | 40 | p =0.15515 q =0.32779             |                            |            |             |
|              | model8 | -1246.283957 | 42 | p0 =0.96782 p =0.20476 q =0.48079 | (p1 =0.03218) w =5.39123   | 47R0.998** | 100P0.996** |
| <i>rpl23</i> | model0 | -494.807769  | 39 | omega (dN/dS) =0.41070            |                            |            |             |
|              | model1 | -494.033568  | 40 | p=0.58808 0.41192                 | w=0.00000 1.00000          |            |             |
|              | model2 | -494.031094  | 42 | p=0.60191 0.00000 0.39809         | w=0.00000 1.00000 1.05503  |            |             |
|              | model3 | -494.031094  | 43 | p=0.37287 0.22904 0.39809         | w=0.00000 0.00000 1.05503  |            |             |
|              | model7 | -494.036598  | 40 | p =0.00500 q =0.00754             |                            |            |             |
|              | model8 | -494.031094  | 42 | p0 =0.60191 p =0.00500 q =1.81908 | (p1 =0.39809) w =1.05503   |            |             |
| <i>rpl32</i> | model0 | -574.150687  | 39 | omega (dN/dS) =0.27924            |                            |            |             |
|              | model1 | -557.620919  | 40 | p=0.65562 0.34438                 | w=0.02683 1.00000          |            |             |
|              | model2 | -549.971425  | 42 | p=0.65022 0.33000 0.01978         | w=0.03908 1.00000 16.81869 | 38R1.000** |             |
|              | model3 | -555.460161  | 43 | p=0.11688 0.83320 0.04992         | w=0.00000 0.25206 7.36254  |            |             |
|              | model7 | -559.633994  | 40 | p =0.35427 q =0.87685             |                            |            |             |
|              | model8 | -551.135135  | 42 | p0 =0.98160 p =0.43722 q =1.16247 | (p1 =0.01840) w =14.44038  | 38R1.000** |             |
| <i>rpl33</i> | model0 | -654.804015  | 39 | omega (dN/dS) =0.28454            |                            |            |             |
|              | model1 | -632.987526  | 40 | p=0.73620 0.26380                 | w=0.03445 1.00000          |            |             |
|              | model2 | -631.2325    | 42 | p=0.76369 0.10207 0.13425         | w=0.05493 1.00000 2.27986  |            |             |
|              | model3 | -631.176337  | 43 | p=0.70792 0.14079 0.15129         | w=0.04085 0.55749 2.25298  |            |             |
|              | model7 | -633.748894  | 40 | p =0.01849 q =0.03720             |                            |            |             |
|              | model8 | -631.199413  | 42 | p0 =0.84236 p =0.28004 q =2.04463 | (p1 =0.15764) w =2.21594   |            |             |
| <i>rpl36</i> | model0 | -435.286609  | 39 | omega (dN/dS) =0.06054            |                            |            |             |
|              | model1 | -432.188161  | 40 | p=0.86518 0.13482                 | w=0.02539 1.00000          |            |             |
|              | model2 | -406.83351   | 42 | p=0.71537 0.25828 0.02634         | w=0.00000 1.00000 28.47280 |            |             |
|              | model3 | -429.580303  | 43 | p=0.37416 0.34901 0.27683         | w=0.00000 0.00000 0.35000  |            |             |
|              | model7 | -430.244936  | 40 | p =0.13307 q =1.21496             |                            |            |             |
|              | model8 | -406.64795   | 42 | p0 =0.97365 p =0.01436 q =0.04342 | (p1 =0.02635) w =27.54440  |            |             |
| <i>rpoA</i>  | model0 | -3238.905022 | 39 | omega (dN/dS) =0.36366            |                            |            |             |
|              | model1 | -3186.355309 | 40 | p=0.73423 0.26577                 | w=0.08998 1.00000          |            |             |
|              | model2 | -3180.555846 | 42 | p=0.74782 0.20897 0.04320         | w=0.10913 1.00000 3.12566  |            |             |
|              | model3 | -3179.500582 | 43 | p=0.80118 0.18998 0.00884         | w=0.13168 1.48909 6.11408  |            |             |



|              |        |              |    |                                     |                             |            |
|--------------|--------|--------------|----|-------------------------------------|-----------------------------|------------|
|              | model1 | -1740.507753 | 40 | p=0.93787 0.06213                   | w=0.11247 1.00000           |            |
|              | model2 | -1710.82983  | 42 | p=0.91077 0.08426 0.00496           | w=0.13251 1.00000 27.40559  |            |
|              | model3 | -1707.960396 | 43 | p=0.96688 0.02816 0.00496           | w=0.16494 2.95427 29.30599  |            |
|              | model7 | -1744.070157 | 40 | p =0.42946 q =1.86247               |                             |            |
|              | model8 | -1713.636801 | 42 | p0 =0.99503 p =0.39853 q =1.32299   | (p1 =0.00497) w =28.50625   |            |
| <i>rps7</i>  | model0 | -855.59567   | 39 | omega (dN/dS) =0.60542              |                             |            |
|              | model1 | -854.305709  | 40 | p=0.44164 0.55836                   | w=0.00000 1.00000           |            |
|              | model2 | -852.446124  | 42 | p=0.96945 0.00000 0.03055           | w=0.49238 1.00000 13.97646  |            |
|              | model3 | -852.446179  | 43 | p=0.83810 0.13135 0.03055           | w=0.49238 0.49239 13.97635  |            |
|              | model7 | -854.343458  | 40 | p =0.00748 q =0.00501               |                             |            |
|              | model8 | -852.447822  | 42 | p0 =0.96950 p =96.27947 q =99.00000 | (p1 =0.03050) w =13.99467   |            |
| <i>rps8</i>  | model0 | -1346.963062 | 39 | omega (dN/dS) =0.17467              |                             |            |
|              | model1 | -1330.459725 | 40 | p=0.86110 0.13890                   | w=0.07875 1.00000           |            |
|              | model2 | -1304.019553 | 42 | p=0.81438 0.17804 0.00758           | w=0.08446 1.00000 20.80704  |            |
|              | model3 | -1303.876714 | 43 | p=0.83874 0.15368 0.00758           | w=0.09509 1.18435 21.41344  |            |
|              | model7 | -1331.391857 | 40 | p =0.25664 q =1.04816               |                             |            |
|              | model8 | -1305.335157 | 42 | p0 =0.99241 p =0.22429 q =0.68848   | (p1 =0.00759) w =20.55281   |            |
| <i>rps11</i> | model0 | -1277.146802 | 39 | omega (dN/dS) =0.13837              |                             |            |
|              | model1 | -1277.147036 | 40 | p=0.99999 0.00001                   | w=0.13837 1.00000           |            |
|              | model2 | -1277.146802 | 42 | p=1.00000 0.00000 0.00000           | w=0.13837 1.00000 1.00000   |            |
|              | model3 | -1275.733146 | 43 | p=0.31824 0.27117 0.41059           | w=0.00000 0.21113 0.21113   |            |
|              | model7 | -1276.264646 | 40 | p =1.35474 q =7.92066               |                             |            |
|              | model8 | -1276.264976 | 42 | p0 =0.99999 p =1.35476 q =7.92090   | (p1 =0.00001) w =1.00000    |            |
| <i>rps12</i> | model0 | -458.976296  | 39 | omega (dN/dS) =1.06338              |                             |            |
|              | model1 | -454.777522  | 40 | p=0.41162 0.58838                   | w=0.00000 1.00000           |            |
|              | model2 | -445.469994  | 42 | p=0.35351 0.62791 0.01858           | w=0.00000 1.00000 266.74739 | 54V0.995** |
|              | model3 | -443.356035  | 43 | p=0.47830 0.50312 0.01858           | w=0.02108 2.64403 493.41327 |            |
|              | model7 | -454.782689  | 40 | p =0.00751 q =0.00500               |                             |            |
|              | model8 | -445.561588  | 42 | p0 =0.98142 p =0.01163 q =0.00500   | (p1 =0.01858) w =281.67180  | 54V0.998** |
| <i>rps14</i> | model0 | -897.217654  | 39 | omega (dN/dS) =0.35311              |                             |            |
|              | model1 | -875.875652  | 40 | p=0.68765 0.31235                   | w=0.00000 1.00000           |            |
|              | model2 | -872.884188  | 42 | p=0.70412 0.23447 0.06141           | w=0.01419 1.00000 3.72094   |            |
|              | model3 | -872.853674  | 43 | p=0.66611 0.26357 0.07032           | w=0.00000 0.82981 3.52715   |            |





|             |        |              |    |                                     |                            |             |             |             |             |             |
|-------------|--------|--------------|----|-------------------------------------|----------------------------|-------------|-------------|-------------|-------------|-------------|
|             | model8 | -6906.68735  | 42 | p0 =0.82510 p =0.34857 q =0.12876   | (p1 =0.17490) w =4.42845   | 44S0.999**  | 96Q0.999**  | 124R1.000** | 131P1.000** | 134P0.998** |
|             |        |              |    |                                     |                            | 135L0.995** | 155K0.996** | 192P1.000** | 204N1.000** | 217Q1.000** |
|             |        |              |    |                                     |                            | 313R0.992** | 314P0.990** | 320A1.000** | 327Y0.998** | 382D0.999** |
| <i>ycf2</i> | model0 | -8911.80907  | 39 | omega (dN/dS) =0.88577              |                            |             |             |             |             |             |
|             | model1 | -8882.989788 | 40 | p=0.35811 0.64189                   | w=0.00000 1.00000          |             |             |             |             |             |
|             | model2 | -8858.616609 | 42 | p=0.31905 0.60694 0.07401           | w=0.00000 1.00000 5.25880  | 159R0.995** | 278I0.998** |             |             |             |
|             | model3 | -8857.038358 | 43 | p=0.51029 0.47309 0.01662           | w=0.10036 1.71918 10.42651 |             |             |             |             |             |
|             | model7 | -8883.686541 | 40 | p =0.00763 q =0.00500               |                            |             |             |             |             |             |
|             | model8 | -8858.827955 | 42 | p0 =0.91518 p =0.03033 q =0.01692   | (p1 =0.08482) w =4.92112   | 159R0.997** | 277K0.993** | 278I0.999** |             |             |
| <i>ycf3</i> | model0 | -1223.692567 | 39 | omega (dN/dS) =0.12214              |                            |             |             |             |             |             |
|             | model1 | -1223.692634 | 40 | p=0.99999 0.00001                   | w=0.12214 1.00000          |             |             |             |             |             |
|             | model2 | -1224.135529 | 42 | p=1.00000 0.00000 0.00000           | w=0.12487 1.00000 1.00000  |             |             |             |             |             |
|             | model3 | -1223.692444 | 43 | p=0.22666 0.26656 0.50678           | w=0.12214 0.12214 0.12214  |             |             |             |             |             |
|             | model7 | -1223.716232 | 40 | p =13.87727 q =99.00000             |                            |             |             |             |             |             |
|             | model8 | -1223.716437 | 42 | p0 =0.99999 p =13.87682 q =99.00000 | (p1 =0.00001) w =1.00000   |             |             |             |             |             |
| <i>ycf4</i> | model0 | -898.191403  | 39 | omega (dN/dS) =0.93575              |                            |             |             |             |             |             |
|             | model1 | -889.319486  | 40 | p=0.40657 0.59343                   | w=0.00000 1.00000          |             |             |             |             |             |
|             | model2 | -884.496114  | 42 | p=0.67597 0.00000 0.32403           | w=0.23210 1.00000 2.71664  |             |             |             |             |             |
|             | model3 | -884.496114  | 43 | p=0.16191 0.51405 0.32403           | w=0.23210 0.23210 2.71664  |             |             |             |             |             |
|             | model7 | -889.322752  | 40 | p =0.00848 q =0.00561               |                            |             |             |             |             |             |
|             | model8 | -884.499812  | 42 | p0 =0.67665 p =30.21125 q =99.00000 | (p1 =0.32335) w =2.71983   | 30R0.992**  |             |             |             |             |

---

**Table S7.** Likelihood ratio test (LRT) of the variable  $\omega$  ratio under different models.

| gene         | comparisons | $2\Delta l$ |            | df | p        |
|--------------|-------------|-------------|------------|----|----------|
| <i>accD</i>  | M0 vs M3    | 237.966698  | 118.983349 | 4  | 8.81E-25 |
|              | M1 vs M2    | 85.152726   | 42.576363  | 2  | 5.68E-10 |
|              | M7 vs M8    | 91.184942   | 45.592471  | 2  | 1.26E-10 |
| <i>ccsA</i>  | M0 vs M3    | 43.479176   | 21.739588  | 4  | 2.26E-04 |
|              | M1 vs M2    | 18.233124   | 9.116562   | 2  | 1.05E-02 |
|              | M7 vs M8    | 20.41827    | 10.209135  | 2  | 6.07E-03 |
| <i>petD</i>  | M0 vs M3    | 91.556788   | 45.778394  | 4  | 2.74E-09 |
|              | M1 vs M2    | 3.768938    | 1.884469   | 2  | 3.90E-01 |
|              | M7 vs M8    | 5.182296    | 2.591148   | 2  | 2.74E-01 |
| <i>petL</i>  | M0 vs M3    | 2.180144    | 1.090072   | 4  | 8.96E-01 |
|              | M1 vs M2    | 1.27689     | 0.638445   | 2  | 7.27E-01 |
|              | M7 vs M8    | 2.749426    | 1.374713   | 2  | 5.03E-01 |
| <i>psbH</i>  | M0 vs M3    | 99.1535     | 49.57675   | 4  | 4.43E-10 |
|              | M1 vs M2    | 57.516426   | 28.758213  | 2  | 5.69E-07 |
|              | M7 vs M8    | 57.488446   | 28.744223  | 2  | 5.73E-07 |
| <i>rbcL</i>  | M0 vs M3    | 230.978146  | 115.489073 | 4  | 4.91E-24 |
|              | M1 vs M2    | 41.00859    | 20.504295  | 2  | 3.53E-05 |
|              | M7 vs M8    | 48.134632   | 24.067316  | 2  | 5.94E-06 |
| <i>rpl22</i> | M0 vs M3    | 82.36515    | 41.182575  | 4  | 2.46E-08 |
|              | M1 vs M2    | 14.537126   | 7.268563   | 2  | 2.64E-02 |
|              | M7 vs M8    | 16.053856   | 8.026928   | 2  | 1.81E-02 |
| <i>rpl32</i> | M0 vs M3    | 37.381052   | 18.690526  | 4  | 9.04E-04 |
|              | M1 vs M2    | 15.298988   | 7.649494   | 2  | 2.18E-02 |
|              | M7 vs M8    | 16.997718   | 8.498859   | 2  | 1.43E-02 |
| <i>rpoC1</i> | M0 vs M3    | 191.648886  | 95.824443  | 4  | 7.61E-20 |
|              | M1 vs M2    | 29.153216   | 14.576608  | 2  | 6.83E-04 |
|              | M7 vs M8    | 39.448928   | 19.724464  | 2  | 5.21E-05 |
| <i>rpoC2</i> | M0 vs M3    | 462.624582  | 231.312291 | 4  | 6.89E-49 |
|              | M1 vs M2    | 52.177988   | 26.088994  | 2  | 2.16E-06 |
|              | M7 vs M8    | 79.29341    | 39.646705  | 2  | 2.46E-09 |
| <i>rps12</i> | M0 vs M3    | 31.240522   | 15.620261  | 4  | 3.57E-03 |
|              | M1 vs M2    | 18.615056   | 9.307528   | 2  | 9.53E-03 |
|              | M7 vs M8    | 18.442202   | 9.221101   | 2  | 9.95E-03 |
| <i>rps15</i> | M0 vs M3    | 21.604172   | 10.802086  | 4  | 4.51E-03 |
|              | M1 vs M2    | 0           | 0          | 2  | 1.00E+00 |
|              | M7 vs M8    | 0.598786    | 0.299393   | 2  | 8.61E-01 |
| <i>rps16</i> | M0 vs M3    | 23.683378   | 11.841689  | 4  | 1.86E-02 |
|              | M1 vs M2    | 19.653774   | 9.826887   | 2  | 7.35E-03 |
|              | M7 vs M8    | 20.322416   | 10.161208  | 2  | 6.22E-03 |
| <i>ycf1</i>  | M0 vs M3    | 322.620932  | 161.310466 | 4  | 7.65E-34 |
|              | M1 vs M2    | 166.031468  | 83.015734  | 2  | 9.41E-19 |
|              | M7 vs M8    | 183.868448  | 91.934224  | 2  | 1.09E-20 |

|             |          |            |           |   |          |
|-------------|----------|------------|-----------|---|----------|
| <i>ycf2</i> | M0 vs M3 | 109.541424 | 54.770712 | 4 | 3.63E-11 |
|             | M1 vs M2 | 48.746358  | 24.373179 | 2 | 5.10E-06 |
|             | M7 vs M8 | 49.717172  | 24.858586 | 2 | 4.00E-06 |
| <i>ycf4</i> | M0 vs M3 | 27.390578  | 13.695289 | 4 | 8.33E-03 |
|             | M1 vs M2 | 9.646744   | 4.823372  | 2 | 8.97E-02 |
|             | M7 vs M8 | 9.64588    | 4.82294   | 2 | 8.97E-02 |

---
